# 1 Novel risk loci for COVID-19 hospitalization among 2 admixed American populations

3 Silvia Diz-de Almeida,<sup>1,2,135</sup> Raquel Cruz,<sup>1,2,135</sup> Andre D. Luchessi,<sup>3</sup> José M. Lorenzo-Salazar,<sup>4</sup>  
4 Miguel López de Heredia,<sup>2</sup> Inés Quintela,<sup>5</sup> Rafaela González-Montelongo,<sup>4</sup> Vivian N. Silbiger,<sup>3</sup>  
5 Marta Sevilla Porras,<sup>2,6</sup> Jair Antonio Tenorio Castaño,<sup>2,6,7</sup> Julian Nevado,<sup>2,6,7</sup> Jose María  
6 Aguado,<sup>8,9,10,11</sup> Carlos Aguilar,<sup>12</sup> Sergio Aguilera-Albesa,<sup>13,14</sup> Virginia Almadana,<sup>15</sup> Berta  
7 Almoguera,<sup>16,2</sup> Nuria Alvarez,<sup>17</sup> Álvaro Andreu-Bernabeu,<sup>18,10</sup> Eunáte Arana-Arri,<sup>19,20</sup> Celso  
8 Arango,<sup>18,21,10</sup> María J. Arranz,<sup>22</sup> Maria-Jesus Artiga,<sup>23</sup> Raúl C. Baptista-Rosas,<sup>24,25,26</sup> María  
9 Barreda- Sánchez,<sup>27,28</sup> Moncef Belhassen-Garcia,<sup>29,30</sup> Joao F. Bezerra,<sup>31</sup> Marcos A.C. Bezerra,<sup>32</sup>  
10 Lucía Boix-Palop,<sup>33</sup> María Brion,<sup>34,35</sup> Ramón Brugada,<sup>36,37,35,38</sup> Matilde Bustos,<sup>39</sup> Enrique J.  
11 Calderón,<sup>39,40,41</sup> Cristina Carbonell,<sup>42,30</sup> Luis Castano,<sup>19,43,2,44,45</sup> Jose E. Castelao,<sup>46</sup> Rosa Conde-  
12 Vicente,<sup>47</sup> M. Lourdes Cordero-Lorenzana,<sup>48</sup> Jose L. Cortes-Sanchez,<sup>49,50</sup> Marta Corton,<sup>16,2</sup> M.  
13 Teresa Darnaude,<sup>51</sup> Alba De Martino-Rodríguez,<sup>52,53</sup> Victor del Campo-Pérez,<sup>54</sup> Aranzazu Diaz  
14 de Bustamante,<sup>51</sup> Elena Domínguez-Garrido,<sup>55</sup> Rocío Eirós,<sup>56</sup> María Carmen Fariñas,<sup>57,58,59</sup>  
15 María J. Fernandez-Nestosa,<sup>60</sup> Uxía Fernández-Robelo,<sup>61</sup> Amanda Fernández-Rodríguez,<sup>62,11</sup>  
16 Tania Fernández-Villa,<sup>63,41</sup> Manuela Gago-Domínguez,<sup>5,64</sup> Belén Gil-Fournier,<sup>65</sup> Javier Gómez-  
17 Arrue,<sup>52,53</sup> Beatriz González Álvarez,<sup>52,53</sup> Fernan Gonzalez Bernaldo de Quirós,<sup>66</sup> Anna  
18 González-Neira,<sup>17</sup> Javier González-Peñas,<sup>18,10,21</sup> Juan F. Gutiérrez-Bautista,<sup>67</sup> María José  
19 Herrero,<sup>68,69</sup> Antonio Herrero-Gonzalez,<sup>70</sup> María A. Jimenez-Sousa,<sup>62,11</sup> María Claudia Lattig,<sup>71,72</sup>  
20 Anabel Liger Borja,<sup>73</sup> Rosario Lopez-Rodriguez,<sup>16,2,74</sup> Esther Mancebo,<sup>75,76</sup> Caridad Martín-  
21 López,<sup>73</sup> Vicente Martín,<sup>63</sup> Oscar Martínez-Nieto,<sup>77,72</sup> Iciar Martínez-Lopez,<sup>78,79</sup> Michel F.  
22 Martínez-Resendez,<sup>49</sup> Ángel Martínez-Perez,<sup>80</sup> Juliana F. Mazzeu,<sup>81,82,83</sup> Eleuterio Merayo  
23 Macías,<sup>84</sup> Pablo Minguez,<sup>16,2</sup> Victor Moreno Cuerda,<sup>85,86</sup> Silviene F. Oliveira,<sup>87,88,83,89</sup> Eva  
24 Ortega-Paino,<sup>23</sup> Mara Parellada,<sup>18,21,10</sup> Estela Paz-Artal,<sup>75,76,90</sup> Ney P.C. Santos,<sup>91</sup> Patricia Pérez-  
25 Matute,<sup>92</sup> Patricia Perez,<sup>93</sup> M. Elena Pérez-Tomás,<sup>27</sup> Teresa Perucho,<sup>94</sup> Mel-lina Pinsach-  
26 Abuin,<sup>36,35</sup> Guillermo Pita,<sup>17</sup> Ericka N. Pompa-Mera,<sup>95,96</sup> Gloria L. Porras-Hurtado,<sup>97</sup> Aurora  
27 Pujol,<sup>98,2,99</sup> Soraya Ramiro León,<sup>65</sup> Salvador Resino,<sup>62,11</sup> Marianne R. Fernandes,<sup>91,100</sup> Emilio  
28 Rodríguez-Ruiz,<sup>101,64</sup> Fernando Rodriguez-Artalejo,<sup>102,103,41,104</sup> José A. Rodriguez-Garcia,<sup>105</sup>  
29 Francisco Ruiz-Cabello,<sup>67,106,107</sup> Javier Ruiz-Hornillos,<sup>108,109,110</sup> Pablo Ryan,<sup>111,112,113,11</sup> José  
30 Manuel Soria,<sup>80</sup> Juan Carlos Souto,<sup>114</sup> Eduardo Tamayo,<sup>115,116,11</sup> Alvaro Tamayo-Velasco,<sup>117</sup>  
31 Juan Carlos Taracido-Fernandez,<sup>70</sup> Alejandro Teper,<sup>118</sup> Lilian Torres-Tobar,<sup>119</sup> Miguel  
32 Urioste,<sup>120</sup> Juan Valencia-Ramos,<sup>121</sup> Zuleima Yáñez,<sup>122</sup> Ruth Zarate,<sup>123</sup> Itziar de Rojas,<sup>124,125</sup>  
33 Agustín Ruiz,<sup>124,125</sup> Pascual Sánchez,<sup>126</sup> Luis Miguel Real,<sup>127</sup> SCOURGE Cohort Group, Encarna  
34 Guillen-Navarro,<sup>27,128,129,130</sup> Carmen Ayuso,<sup>16,2</sup> Esteban Parra,<sup>131</sup> José A. Riancho,<sup>57,58,59,2</sup>  
35 Augusto Rojas-Martinez,<sup>132</sup> Carlos Flores,<sup>4,133,134,136,\*</sup> Pablo Lapunzina,<sup>2,6,7,136</sup> Ángel  
36 Carracedo,<sup>1,2,5,64,136,\*\*</sup>

## 37 Affiliations

38 <sup>1</sup>, Centro Singular de Investigación en Medicina Molecular y Enfermedades Crónicas (CIMUS),  
39 Universidade de Santiago de Compostela, Santiago de Compostela, Spain

40 <sup>2</sup>, CIBERER, ISCIII, Madrid, Spain

- 41 <sup>3</sup>, Universidade Federal do Rio Grande do Norte, Departamento de Análises Clínicas e  
42 Toxicológicas, Natal, Brazil
- 43 <sup>4</sup>, Genomics Division, Instituto Tecnológico y de Energías Renovables, Santa Cruz de Tenerife,  
44 Spain
- 45 <sup>5</sup>, Fundación Pública Galega de Medicina Xenómica, Sistema Galego de Saúde (SERGAS)  
46 Santiago de Compostela, Spain
- 47 <sup>6</sup>, Instituto de Genética Médica y Molecular (INGEMM), Hospital Universitario La Paz-  
48 IDIPAZ, Madrid, Spain
- 49 <sup>7</sup>, ERN-ITHACA-European Reference Network
- 50 <sup>8</sup>, Unit of Infectious Diseases, Hospital Universitario 12 de Octubre, Instituto de Investigación  
51 Sanitaria Hospital 12 de Octubre (imas12), Madrid, Spain
- 52 <sup>9</sup>, Spanish Network for Research in Infectious Diseases (REIPI RD16/0016/0002), Instituto de  
53 Salud Carlos III, Madrid, Spain
- 54 <sup>10</sup>, School of Medicine, Universidad Complutense, Madrid, Spain
- 55 <sup>11</sup>, CIBERINFEC, ISCIII, Madrid, Spain
- 56 <sup>12</sup>, Hospital General Santa Bárbara de Soria, Soria, Spain
- 57 <sup>13</sup>, Pediatric Neurology Unit, Department of Pediatrics, Navarra Health Service Hospital,  
58 Pamplona, Spain
- 59 <sup>14</sup>, Navarra Health Service, NavarraBioMed Research Group, Pamplona, Spain
- 60 <sup>15</sup>, Hospital Universitario Virgen Macarena, Neumología, Seville, Spain
- 61 <sup>16</sup>, Department of Genetics & Genomics, Instituto de Investigación Sanitaria-Fundación Jiménez  
62 Díaz University Hospital - Universidad Autónoma de Madrid (IIS-FJD, UAM), Madrid, Spain
- 63 <sup>17</sup>, Spanish National Cancer Research Centre, Human Genotyping-CEGEN Unit, Madrid, Spain
- 64 <sup>18</sup>, Department of Child and Adolescent Psychiatry, Institute of Psychiatry and Mental Health,  
65 Hospital General Universitario Gregorio Marañón (IiSGM), Madrid, Spain
- 66 <sup>19</sup>, Biocruces Bizkai HRI, Bizkaia, Spain
- 67 <sup>20</sup>, Cruces University Hospital, Osakidetza, Bizkaia, Spain
- 68 <sup>21</sup>, Centre for Biomedical Network Research on Mental Health (CIBERSAM), Instituto de Salud  
69 Carlos III, Madrid, Spain
- 70 <sup>22</sup>, Fundació Docència I Recerca Mutua Terrassa, Barcelona, Spain
- 71 <sup>23</sup>, Spanish National Cancer Research Center, CNIO Biobank, Madrid, Spain
- 72 <sup>24</sup>, Hospital General de Occidente, Zapopan Jalisco, Mexico
- 73 <sup>25</sup>, Centro Universitario de Tonalá, Universidad de Guadalajara, Tonalá Jalisco, Mexico
- 74 <sup>26</sup>, Centro de Investigación Multidisciplinario en Salud, Universidad de Guadalajara, Tonalá  
75 idisJalisco, Mexico

- 76 <sup>27</sup>, Instituto Murciano de Investigación Biosanitaria (IMIB-Arrixaca), Murcia, Spain
- 77 <sup>28</sup>, Universidad Católica San Antonio de Murcia (UCAM), Murcia, Spain
- 78 <sup>29</sup>, Hospital Universitario de Salamanca-IBSAL, Servicio de Medicina Interna-Unidad de  
79 Enfermedades Infecciosas, Salamanca, Spain
- 80 <sup>30</sup>, Universidad de Salamanca, Salamanca, Spain
- 81 <sup>31</sup>, Escola Técnica de Saúde, Laboratório de Vigilância Molecular Aplicada, Brazil
- 82 <sup>32</sup>, Federal University of Pernambuco, Genetics Postgraduate Program, Recife, PE, Brazil
- 83 <sup>33</sup>, Hospital Universitario Mutua Terrassa, Barcelona, Spain
- 84 <sup>34</sup>, Instituto de Investigación Sanitaria de Santiago (IDIS), Xenética Cardiovascular, Santiago de  
85 Compostela, Spain
- 86 <sup>35</sup>, CIBERCV, ISCIII, Madrid, Spain
- 87 <sup>36</sup>, Cardiovascular Genetics Center, Institut d'Investigació Biomèdica Girona (IDIBGI), Girona,  
88 Spain
- 89 <sup>37</sup>, Medical Science Department, School of Medicine, University of Girona, Girona, Spain
- 90 <sup>38</sup>, Hospital Josep Trueta, Cardiology Service, Girona, Spain
- 91 <sup>39</sup>, Institute of Biomedicine of Seville (IBiS), Consejo Superior de Investigaciones Científicas  
92 (CSIC)- University of Seville- Virgen del Rocío University Hospital, Seville, Spain
- 93 <sup>40</sup>, Departamento de Medicina, Hospital Universitario Virgen del Rocío, Universidad de Sevilla,  
94 Seville, Spain
- 95 <sup>41</sup>, CIBERESP, ISCIII, Madrid, Spain
- 96 <sup>42</sup>, Hospital Universitario de Salamanca-IBSAL, Servicio de Medicina Interna, Salamanca,  
97 Spain
- 98 <sup>43</sup>, Osakidetza, Cruces University Hospital, Bizkaia, Spain
- 99 <sup>44</sup>, Centre for Biomedical Network Research on Diabetes and Metabolic Associated Diseases  
100 (CIBERDEM), Instituto de Salud Carlos III, Madrid, Spain
- 101 <sup>45</sup>, University of Pais Vasco, UPV/EHU, Bizkaia, Spain
- 102 <sup>46</sup>, Oncology and Genetics Unit, Instituto de Investigación Sanitaria Galicia Sur, Xerencia de  
103 Xestión Integrada de Vigo-Servizo Galego de Saúde, Vigo, Spain
- 104 <sup>47</sup>, Hospital Universitario Río Hortega, Valladolid, Spain
- 105 <sup>48</sup>, Servicio de Medicina intensiva, Complejo Hospitalario Universitario de A Coruña  
106 (CHUAC), Sistema Galego de Saúde (SERGAS), A Coruña, Spain
- 107 <sup>49</sup>, Tecnológico de Monterrey, Monterrey, Mexico
- 108 <sup>50</sup>, Otto von Guericke University, Department of Microgravity and Translational Regenerative  
109 Medicine, Magdeburg, Germany
- 110 <sup>51</sup>, Hospital Universitario Mostoles, Unidad de Genética, Madrid, Spain

- 111 <sup>52</sup>, Instituto Aragonés de Ciencias de la Salud (IACS), Zaragoza, Spain
- 112 <sup>53</sup>, Instituto Investigación Sanitaria Aragón (IIS-Aragon), Zaragoza, Spain
- 113 <sup>54</sup>, Preventive Medicine Department, Instituto de Investigación Sanitaria Galicia Sur, Xerencia  
114 de Xestión Integrada de Vigo-Servizo Galego de Saúde, Vigo, Spain
- 115 <sup>55</sup>, Unidad Diagnóstico Molecular. Fundación Rioja Salud, La Rioja, Spain
- 116 <sup>56</sup>, Hospital Universitario de Salamanca-IBSAL, Servicio de Cardiología, Salamanca, Spain
- 117 <sup>57</sup>, IDIVAL, Cantabria, Spain
- 118 <sup>58</sup>, Universidad de Cantabria, Cantabria, Spain
- 119 <sup>59</sup>, Hospital U M Valdecilla, Cantabria, Spain
- 120 <sup>60</sup>, Universidad Nacional de Asunción, Facultad de Politécnica, Paraguay
- 121 <sup>61</sup>, Urgencias Hospitalarias, Complejo Hospitalario Universitario de A Coruña (CHUAC),  
122 Sistema Galego de Saúde (SERGAS), A Coruña, Spain
- 123 <sup>62</sup>, Unidad de Infección Viral e Inmunidad, Centro Nacional de Microbiología (CNM), Instituto  
124 de Salud Carlos III (ISCIII), Madrid, Spain
- 125 <sup>63</sup>, Grupo de Investigación en Interacciones Gen-Ambiente y Salud (GIIGAS) - Instituto de  
126 Biomedicina (IBIOMED), Universidad de León, León, Spain
- 127 <sup>64</sup>, IDIS
- 128 <sup>65</sup>, Hospital Universitario de Getafe, Servicio de Genética, Madrid, Spain
- 129 <sup>66</sup>, Ministerio de Salud Ciudad de Buenos Aires, Buenos Aires, Argentina
- 130 <sup>67</sup>, Hospital Universitario Virgen de las Nieves, Servicio de Análisis Clínicos e Inmunología,  
131 Granada, Spain
- 132 <sup>68</sup>, IIS La Fe, Plataforma de Farmacogenética, Valencia, Spain
- 133 <sup>69</sup>, Universidad de Valencia, Departamento de Farmacología, Valencia, Spain
- 134 <sup>70</sup>, Data Analysis Department, Instituto de Investigación Sanitaria-Fundación Jiménez Díaz  
135 University Hospital - Universidad Autónoma de Madrid (IIS-FJD, UAM), Madrid, Spain
- 136 <sup>71</sup>, Universidad de los Andes, Facultad de Ciencias, Bogotá, Colombia
- 137 <sup>72</sup>, SIGEN Alianza Universidad de los Andes - Fundación Santa Fe de Bogotá, Bogotá,  
138 Colombia
- 139 <sup>73</sup>, Hospital General de Segovia, Medicina Intensiva, Segovia, Spain
- 140 <sup>74</sup>, Facultad de Farmacia, Universidad San Pablo-CEU, CEU Universities, Urbanización  
141 Montepríncipe, 28660 Boadilla del Monte, España
- 142 <sup>75</sup>, Hospital Universitario 12 de Octubre, Department of Immunology, Madrid, Spain
- 143 <sup>76</sup>, Instituto de Investigación Sanitaria Hospital 12 de Octubre (imas12), Transplant  
144 Immunology and Immunodeficiencies Group, Madrid, Spain

- 145 <sup>77</sup>, Fundación Santa Fe de Bogota, Departamento Patología y Laboratorios, Bogotá, Colombia
- 146 <sup>78</sup>, Unidad de Genética y Genómica Islas Baleares, Islas Baleares, Spain
- 147 <sup>79</sup>, Hospital Universitario Son Espases, Unidad de Diagnóstico Molecular y Genética Clínica,  
148 Islas Baleares, Spain
- 149 <sup>80</sup>, Genomics of Complex Diseases Unit, Research Institute of Hospital de la Santa Creu i Sant  
150 Pau, IIB Sant Pau, Barcelona, Spain
- 151 <sup>81</sup>, Universidade de Brasília, Faculdade de Medicina, Brazil
- 152 <sup>82</sup>, Programa de Pós-Graduação em Ciências Médicas (UnB), Brazil
- 153 <sup>83</sup>, Programa de Pós-Graduação em Ciências da Saúde (UnB), Brazil
- 154 <sup>84</sup>, Hospital El Bierzo, Unidad Cuidados Intensivos, León, Spain
- 155 <sup>85</sup>, Hospital Universitario Mostoles, Medicina Interna, Madrid, Spain
- 156 <sup>86</sup>, Universidad Francisco de Vitoria, Madrid, Spain
- 157 <sup>87</sup>, Departamento de Genética e Morfologia, Instituto de Ciências Biológicas, Universidade de  
158 Brasília, Brazil
- 159 <sup>88</sup>, Programa de Pós-Graduação em Biologia Animal (UnB), Brazil
- 160 <sup>89</sup>, Programa de Pós-Graduação Profissional em Ensino de Biologia (UnB), Brazil
- 161 <sup>90</sup>, Universidad Complutense de Madrid, Department of Immunology, Ophthalmology and ENT,  
162 Madrid, Spain
- 163 <sup>91</sup>, Universidade Federal do Pará, Núcleo de Pesquisas em Oncologia, Belém, Pará, Brazil
- 164 <sup>92</sup>, Infectious Diseases, Microbiota and Metabolism Unit, CSIC Associated Unit, Center for  
165 Biomedical Research of La Rioja (CIBIR), Logroño, Spain
- 166 <sup>93</sup>, Inditex, A Coruña, Spain
- 167 <sup>94</sup>, GENYCA, Madrid, Spain
- 168 <sup>95</sup>, Instituto Mexicano del Seguro Social (IMSS), Centro Médico Nacional Siglo XXI, Unidad  
169 de Investigación Médica en Enfermedades Infecciosas y Parasitarias, Mexico City, Mexico
- 170 <sup>96</sup>, Instituto Mexicano del Seguro Social (IMSS), Centro Médico Nacional La Raza. Hospital de  
171 Infectología, Mexico City, Mexico
- 172 <sup>97</sup>, Clinica Comfamiliar Risaralda, Pereira, Colombia
- 173 <sup>98</sup>, Bellvitge Biomedical Research Institute (IDIBELL), Neurometabolic Diseases Laboratory,  
174 L'Hospitalet de Llobregat, Spain
- 175 <sup>99</sup>, Catalan Institution of Research and Advanced Studies (ICREA), Barcelona, Spain
- 176 <sup>100</sup>, Hospital Ophir Loyola, Departamento de Ensino e Pesquisa, Belém, Pará, Brazil
- 177 <sup>101</sup>, Unidad de Cuidados Intensivos, Hospital Clínico Universitario de Santiago (CHUS),  
178 Sistema Galego de Saúde (SERGAS), Santiago de Compostela, Spain

179 <sup>102</sup>, Department of Preventive Medicine and Public Health, School of Medicine, Universidad  
180 Autónoma de Madrid, Madrid, Spain

181 <sup>103</sup>, IdiPaz (Instituto de Investigación Sanitaria Hospital Universitario La Paz), Madrid, Spain

182 <sup>104</sup>, IMDEA-Food Institute, CEI UAM+CSIC, Madrid, Spain

183 <sup>105</sup>, Complejo Asistencial Universitario de León, León, Spain

184 <sup>106</sup>, Instituto de Investigación Biosanitaria de Granada (ibs GRANADA), Granada, Spain

185 <sup>107</sup>, Universidad de Granada, Departamento Bioquímica, Biología Molecular e Inmunología III,  
186 Granada, Spain

187 <sup>108</sup>, Hospital Infanta Elena, Allergy Unit, Valdemoro, Madrid, Spain

188 <sup>109</sup>, Instituto de Investigación Sanitaria-Fundación Jiménez Díaz University Hospital -  
189 Universidad Autónoma de Madrid (IIS-FJD, UAM), Madrid, Spain

190 <sup>110</sup>, Faculty of Medicine, Universidad Francisco de Vitoria, Madrid, Spain

191 <sup>111</sup>, Hospital Universitario Infanta Leonor, Madrid, Spain

192 <sup>112</sup>, Complutense University of Madrid, Madrid, Spain

193 <sup>113</sup>, Gregorio Marañón Health Research Institute (IiSGM), Madrid, Spain

194 <sup>114</sup>, Haemostasis and Thrombosis Unit, Hospital de la Santa Creu i Sant Pau, IIB Sant Pau,  
195 Barcelona, Spain

196 <sup>115</sup>, Hospital Clinico Universitario de Valladolid, Servicio de Anestesiología y Reanimación,  
197 Valladolid, Spain

198 <sup>116</sup>, Universidad de Valladolid, Departamento de Cirugía, Valladolid, Spain

199 <sup>117</sup>, Hospital Clinico Universitario de Valladolid, Servicio de Hematología y Hemoterapia,  
200 Valladolid, Spain

201 <sup>118</sup>, Hospital de Niños Ricardo Gutierrez, Buenos Aires, Argentina

202 <sup>119</sup>, Fundación Universitaria de Ciencias de la Salud

203 <sup>120</sup>, Spanish National Cancer Research Centre, Familial Cancer Clinical Unit, Madrid, Spain

204 <sup>121</sup>, University Hospital of Burgos, Burgos, Spain

205 <sup>122</sup>, Universidad Simón Bolívar, Facultad de Ciencias de la Salud, Barranquilla, Colombia

206 <sup>123</sup>, Centro para el Desarrollo de la Investigación Científica, Paraguay

207 <sup>124</sup> <sup>183</sup>, Research Center and Memory clinic, ACE Alzheimer Center Barcelona, Universitat  
208 Internacional de Catalunya, Spain

209 <sup>125</sup> <sup>184</sup>, Centre for Biomedical Network Research on Neurodegenerative Diseases (CIBERNED),  
210 Instituto de Salud Carlos III, Madrid, Spain

211 <sup>126</sup> <sup>185</sup>, CIEN Foundation/Queen Sofia Foundation Alzheimer Center, Madrid, Spain

212 <sup>127</sup> <sup>186</sup>, Hospital Universitario de Valme, Unidad Clínica de Enfermedades Infecciosas y  
213 Microbiología, Sevilla, Spain

214 <sup>128</sup> <sup>124</sup>, Sección Genética Médica - Servicio de Pediatría, Hospital Clínico Universitario Virgen  
215 de la Arrixaca, Servicio Murciano de Salud, Murcia, Spain

216 <sup>129</sup> <sup>125</sup>, Departamento Cirugía, Pediatría, Obstetricia y Ginecología, Facultad de Medicina,  
217 Universidad de Murcia (UMU), Murcia, Spain

218 <sup>130</sup> <sup>126</sup>, Grupo Clínico Vinculado, Centre for Biomedical Network Research on Rare Diseases  
219 (CIBERER), Instituto de Salud Carlos III, Madrid, Spain

220 <sup>131</sup> <sup>127</sup> Department of Anthropology, University of Toronto at Mississauga, Mississauga, Ontario,  
221 Canada.

222 <sup>132</sup> <sup>128</sup>, Tecnológico de Monterrey, Escuela de Medicina y Ciencias de la Salud, Monterrey,  
223 Mexico

224 <sup>133</sup> <sup>129</sup>, Research Unit, Hospital Universitario Nuestra Señora de Candelaria, Santa Cruz de  
225 Tenerife, Spain

226 <sup>134</sup> <sup>130</sup>, Centre for Biomedical Network Research on Respiratory Diseases (CIBERES), Instituto  
227 de Salud Carlos III, Madrid, Spain

228 <sup>135</sup> <sup>131</sup>, These authors contributed equally: Silvia Diz-de Almeida, Raquel Cruz

229 <sup>136</sup> <sup>132</sup>, These authors contributed equally: Carlos Flores, Pablo Lapunzina, Ángel Carracedo

230 \*Correspondence: [cflores@ull.edu.es](mailto:cflores@ull.edu.es)

231 \*\*Correspondence: [angel.carracedo@usc.es](mailto:angel.carracedo@usc.es)

232

233 **Abstract**

234 The genetic basis of severe COVID-19 has been thoroughly studied and many genetic  
235 risk factors shared between populations have been identified. However, reduced sample  
236 sizes from non-European groups have limited the discovery of population-specific  
237 common risk loci. In this second study nested in the SCOURGE consortium, we have  
238 conducted the largest GWAS meta-analysis for COVID-19 hospitalization in admixed  
239 Americans, comprising a total of 4,702 hospitalized cases recruited by SCOURGE and  
240 other seven participating studies in the COVID-19 Host Genetic Initiative. We  
241 identified four genome-wide significant associations, two of which constitute novel loci  
242 and first discovered in Latin-American populations (*BAZ2B* and *DDIAS*). A trans-ethnic  
243 meta-analysis revealed another novel cross-population risk locus in *CREBBP*. Finally,  
244 we assessed the performance of a cross-ancestry polygenic risk score in the SCOURGE  
245 admixed American cohort.

246 **Introduction**

247 To date, more than 50 loci associated to COVID-19 susceptibility, hospitalization, and  
248 severity have been identified using genome-wide association studies (GWAS)<sup>1,2</sup>. The  
249 COVID-19 Host Genetics Initiative (HGI) has made significant efforts<sup>3</sup> to augment the  
250 power to identify disease loci by recruiting individuals from diverse populations and  
251 conducting a trans-ancestry meta-analysis. Despite this, the lack of genetic diversity and  
252 a focus on cases of European ancestries still predominate in the studies<sup>4,5</sup>. Besides,  
253 while trans-ancestry meta-analyses are a powerful approach for discovering shared  
254 genetic risk variants with similar effects across populations<sup>6</sup>, they may fail to identify  
255 risk variants that have larger effects on particular underrepresented populations. Genetic  
256 disease risk has been shaped by the particular evolutionary history of populations and  
257 the environmental exposures<sup>7</sup>. Their action is particularly important for infectious



258 diseases due to the selective constraints that are imposed by the host-pathogen  
259 interactions<sup>8,9</sup>. Literature examples of this in COVID-19 severity includes a *DOCK2*  
260 gene variant in East Asians<sup>10</sup>, and frequent loss of function variants in *IFNARI* and  
261 *IFNAR2* genes in Polynesian and Inuit populations, respectively<sup>11,12</sup>.

262 Including diverse populations in case-control GWAS studies with unrelated participants  
263 usually require a prior classification of individuals in genetically homogeneous groups,  
264 which are typically analysed separately to control the population stratification effects<sup>13</sup>.  
265 Populations with recent admixture impose an additional challenge to the GWAS due to  
266 their complex genetic diversity and linkage disequilibrium (LD) patterns, requiring the  
267 development of alternative approaches and a careful inspection of results to reduce the  
268 false positives due to population structure<sup>7</sup>. In fact, there are benefits in study power  
269 from modelling the admixed ancestries either locally, at regional scale in the  
270 chromosomes, or globally, across the genome, depending on factors such as the  
271 heterogeneity of the risk variant in frequencies or the effects among the ancestry  
272 strata<sup>14</sup>. Despite the development of novel methods specifically tailored for the analysis  
273 of admixed populations<sup>15</sup>, the lack of a standardized analysis framework and the  
274 difficulties to confidently cluster the admixed individuals into particular genetic groups  
275 often leads to their exclusion from GWAS.

276 The Spanish Coalition to Unlock Research on Host Genetics on COVID-19  
277 (SCOURGE) recruited COVID-19 patients between March and December 2020 from  
278 hospitals across Spain and from March 2020 to July 2021 in Latin-America  
279 (<https://www.scourge-covid.org>). A first GWAS of COVID-19 severity among Spanish  
280 patients of European descent revealed novel disease loci and explored age and sex  
281 varying effects of the genetic factors<sup>16</sup>. Here we present the findings of a GWAS meta-  
282 analysis in admixed American (AMR) populations, comprising individuals from the

283 SCOURGE Latin-American cohort and the HGI studies, which allowed to identify two  
284 novel severe COVID-19 loci, *BAZ2B* and *DDIAS*. Further analyses modelling the  
285 admixture from three genetic ancestral components and performing a trans-ethnic meta-  
286 analysis led to the identification of an additional risk locus near *CREBBP*. We finally  
287 assessed a cross-ancestry polygenic risk score model with variants associated with  
288 critical COVID-19.

## 289 **Results**

### 290 **Meta-analysis of COVID-19 hospitalization in admixed Americans**

#### 291 *Study cohorts*

292 Within the SCOURGE consortium, we included 1,608 hospitalized cases and 1,887  
293 controls (not hospitalized COVID-19 patients) from Latin-American countries and from  
294 recruitments of individuals of Latin-American descent conducted in Spain  
295 (Supplementary Table 1). Quality control details and estimation of global genetic  
296 inferred ancestry (GIA) (supplementary Figure 1) are described in Methods, whereas  
297 clinical and demographic characteristics of patients included in the analysis are shown  
298 in Table 1. Summary statistics from the SCOURGE cohort were obtained under a  
299 logistic mixed model with the SAIGE model (Methods). Another seven studies  
300 participating in the COVID-19 HGI consortium were included in the meta-analysis of  
301 COVID-19 hospitalization in admixed Americans (Figure 1).

#### 302 *GWAS meta-analysis*

303 We performed a fixed-effects GWAS meta-analysis using the inverse of the variance as  
304 weights for the overlapping markers. The combined GWAS sample size consisted of  
305 4,702 admixed AMR hospitalized cases and 68,573 controls.

306 This GWAS meta-analysis revealed genome-wide significant associations at four risk  
307 loci (Table 2, Figure 2), two of which (*BAZ2B* and *DDIAS*) were novel discoveries.  
308 Variants of these loci were prioritized by positional and expression quantitative trait loci  
309 (eQTL) mapping with FUMA, identifying four lead variants linked to other 310 variants  
310 and 31 genes (Supplementary Tables 2-4). A gene-based association test revealed a  
311 significant association in *BAZ2B* and in previously known COVID-19 risk loci:  
312 *LZTFL1*, *XCRI*, *FYCO1*, *CCR9*, and *IFNAR2* (Supplementary Table 5).

313 Located within the gene *BAZ2B*, the sentinel variant rs13003835 is an intronic variant  
314 associated with an increased risk of COVID-19 hospitalization (Odds Ratio [OR]=1.20,  
315 95% Confidence Interval [CI]=1.12-1.27,  $p=3.66 \times 10^{-8}$ ). This association was not  
316 previously reported in any GWAS of COVID-19 published to date. Interestingly,  
317 rs13003835 did not reach significance ( $p=0.972$ ) in the COVID-19 HGI trans-ancestry  
318 meta-analysis including the five population groups<sup>1</sup>. Based on our mapping strategy  
319 (see Methods), we also prioritized *PLA2R1*, *LY75*, *WDSUB1*, and *CD302* in this locus.

320 The other novel risk locus is led by the sentinel variant rs77599934, a rare intronic  
321 variant located in chromosome 11 within *DDIAS* and associated with risk of COVID-19  
322 hospitalization (OR=2.27, 95%CI=1.70-3.04,  $p=2.26 \times 10^{-8}$ ). The *PRCP* gene was an  
323 additional prioritized gene at this locus.

324 We also observed a suggestive association with rs2601183 in chromosome 15, which is  
325 located between *ZNF774* and *IQGAP1* (allele-G OR=1.20, 95%CI=1.12-1.29,  
326  $p=6.11 \times 10^{-8}$ , see Supplementary Table 2), which has not yet been reported in any other  
327 GWAS of COVID-19 to date. This sentinel variant is in perfect LD ( $r^2=1$ ) with  
328 rs601183, an eQTL of *ZNF774* in the lung.

329 The GWAS meta-analysis also pinpointed two significant variants at known loci,  
330 *LZTFL1* and *FOXP4*. The SNP rs35731912 was previously associated with COVID-19  
331 severity in EUR populations<sup>17</sup>, and it was mapped to *LZTFL1*. As for rs2477820, while  
332 it is a novel risk variant within gene *FOXP4*, it has a moderate LD ( $r^2=0.295$ ) with  
333 rs2496644, which has been linked to COVID-19 hospitalization<sup>18</sup>. This is consistent  
334 with the effects of LD in tag-SNPs when conducting GWAS in diverse populations.

### 335 **Functional mapping of novel risk variants**

#### 336 *Bayesian fine mapping*

337 We performed different approaches to narrow down the prioritized loci to a set of most  
338 probable genes driving the associations. First, we computed credible sets at the 95%  
339 confidence for causal variants and annotated them with VEP and the V2G aggregate  
340 scoring (Supplementary Table 6, Supplementary Figure 3). The 95% confidence  
341 credible set from the region of chromosome 2 around rs13003835 included 76 variants.  
342 However, the approach was unable to converge allocating variants in a 95% confidence  
343 credible set for the region in chromosome 11.

#### 344 *Colocalization of eQTLs*

345 To determine if the novel genetic risk loci were associated with gene expression in  
346 relevant tissues (whole blood, lung, lymphocytes, and oesophagus mucosa), we  
347 computed the posterior probabilities (PP) of colocalization for overlapping variants  
348 allocated to the 95% confidence credible set. We used the GTEx v8 tissues as the main  
349 expression dataset, although it is important to consider that the eQTL associations were  
350 carried out mainly on individuals of EUR ancestries. To confirm the colocalization in  
351 other ancestries, we also performed analyses on three expression datasets computed on  
352 admixed AMR, leveraging data from individuals with high African GIA, high Native-

353 American ancestry, and from a pooled cohort (Methods). Results are shown in the  
354 supplementary Table 7.

355 Five genes (*LY75*, *BAZ2B*, *CD302*, *WDSUB1*, and *PLA2R1*) were the candidates for  
356 eQTL colocalization in the associated region in chromosome 2. However, *LY75*  
357 emerged as the most likely causal gene for this locus since the colocalization in whole  
358 blood was supported with a PP for H4 (PPH4) of 0.941 and with robust results  
359 (supplementary Figure 4). Moreover, this also allowed to prioritize rs12692550 as the  
360 most probable causal variant for both traits at this locus with a PP\_SNP\_H4 of 0.74.  
361 Colocalization with gene expression data from admixed AMR validated this finding.  
362 *LY75* also had evidence of colocalization in lungs (PPH4=0.887) and the esophagus  
363 mucosa (PPH4=0.758). However, we could not prioritize a single causal variant in these  
364 two other tissues and sensitivity analyses revealed a weak support.

365 *CD302* and *BAZ2B* were the second and third most likely genes that could drive the  
366 association, respectively, according to the colocalization evidence. *CD302* was the most  
367 probable according to the high AFR genetic ancestries dataset (supplementary Figure  
368 5).

369 Despite the chromosome 11 region failing to colocalize with gene expression  
370 associations for any of the tissues, the lead variant rs77599934 is in moderate-to-strong  
371 LD ( $r^2=0.776$ ) with rs60606421, which is an eQTL associated to a reduced expression  
372 of *DDIAS* in the lungs (supplementary Figure 6). The highest PPH4 for *DDIAS* was in  
373 the high AFR genetic ancestry expression dataset (0.71).

#### 374 *Transcriptome-wide association study (TWAS)*

375 Five novel genes, namely *SLC25A37*, *SMARCC1*, *CAMP*, *TYW3*, and *S100A12*  
376 (supplementary Table 8) were found significantly associated in the cross-tissue TWAS.

377 To our knowledge, these genes have not been reported previously in any COVID-19  
378 TWAS or GWAS analyses published to date. In the single tissue analyses, *ATP5O* and  
379 *CXCR6* were significantly associated in lungs, *CCR9* was significantly associated in  
380 whole blood, and *IFNAR2* and *SLC25A37* were associated in lymphocytes.

381 Likewise, we carried out the TWAS analyses using the models trained in the admixed  
382 populations. However, no significant gene-pairs were detected in this case. The 50  
383 genes with the lowest p-values are shown in the supplementary Table 9.

#### 384 **Genetic architecture of COVID-19 hospitalization in AMR populations**

##### 385 *Allele frequencies of rs13003835 and rs77599934 across ancestries*

386 Neither rs13003835 (*BAZ2B*) or rs77599934 (*DDIAS*) were significantly associated in  
387 the COVID-19 HGI B2 cross-population or population-specific meta-analyses. Thus,  
388 we investigated their allele frequencies (AF) across populations and compared their  
389 effect sizes.

390 According to gnomAD v3.1.2, the T allele at rs13003835 (*BAZ2B*) has an AF of 43% in  
391 admixed AMR groups while AF is lower in the EUR populations (16%) and in the  
392 global sample (29%). Local ancestry inference (LAI) reported by gnomAD shows that  
393 within the Native-American component, the risk allele T is the major allele, whereas it  
394 is the minor allele within the African and European LAI components. These large  
395 differences in AF might be the reason underlying the association found in AMR  
396 populations. However, when comparing effect sizes between populations, we found that  
397 they were in opposite direction between SAS-AMR and EUR-AFR-EAS and that there  
398 was a large heterogeneity among them (Figure 3).

399 rs77599934 (*DDIAS*) had an AF of 1.1% for the G allele in the non-hospitalized  
400 controls (Table 2), in line with the recorded gnomAD AF of 1% in admixed AMR

401 groups. This variant has potential to be population-specific variant, given the allele  
402 frequencies in other population groups such as EUR (0% in Finnish, 0.025% in non-  
403 Finnish), EAS (0%) and SAS (0.042%) and its greater effect size over AFR populations  
404 (Figure 3). Examining the LAI, the G allele occurs at 1.1% frequency in the African  
405 component while it is almost absent in the Native-American and European. Due to its  
406 low MAF, rs77599934 was not analyzed in the COVID-19 HGI B2 cross-population  
407 meta-analysis and was only present in the HGI B2 AFR population-specific meta-  
408 analysis, precluding the comparison (Figure 3). For this reason, we retrieved the variant  
409 with the lowest p-value within a 50 kb region around rs77599934 in the COVID-19  
410 HGI cross-population analysis to investigate if it was in moderate-to-strong LD with our  
411 sentinel variant. The variant with the smallest p-value was rs75684040 (OR=1.07,  
412 95%CI=1.03-1.12,  $p=1.84 \times 10^{-3}$ ). Yet, LD calculations using the 1KGP phase 3 dataset  
413 indicated that rs77599934 and rs75684040 were poorly correlated ( $r^2=0.11$ ).

#### 414 *Cross-population meta-analyses*

415 We carried out two cross-ancestry inverse variance-weighted fixed-effects meta-  
416 analyses with the admixed AMR GWAS meta-analysis results to evaluate whether the  
417 discovered risk loci replicated when considering other population groups. In doing so,  
418 we also identified novel cross-population COVID-19 hospitalization risk loci.

419 First, we combined the SCOURGE Latin American GWAS results with the HGI B2  
420 ALL analysis (supplementary Table 10). We refer to this analysis as the SC-HGI<sub>ALL</sub>  
421 meta-analysis. Out of the 40 genome-wide significant loci associated with COVID-19  
422 hospitalization in the last HGI release<sup>1</sup>, this study replicated 39 and the association was  
423 stronger than in the original study in 29 of those (supplementary Table 11). However,  
424 the variant rs13003835 located in *BAZ2B* did not replicate (OR=1.00, 95%CI=0.98-  
425 1.03,  $p=0.644$ ).

426 In this cross-ancestry meta-analysis, we replicated two associations that were not found  
427 in HGIv7 albeit they were sentinel variants in the latest GenOMICC meta-analysis<sup>2</sup>. We  
428 found an association at the *CASC20* locus led by the variant rs2876034 (OR=0.95,  
429 95%CI=0.93-0.97,  $p=2.83 \times 10^{-8}$ ). This variant is in strong LD with the sentinel variant  
430 of that study (rs2326788,  $r^2=0.92$ ), which was associated with critical COVID-19<sup>2</sup>.  
431 Besides, this meta-analysis identified the variant rs66833742 near *ZBTB7A* associated  
432 with COVID-19 hospitalization (OR=0.94, 95%CI=0.92-0.96,  $p=2.50 \times 10^{-8}$ ). Notably,  
433 rs66833742 or its perfect proxy rs67602344 ( $r^2=1$ ) are also associated with upregulation  
434 of *ZBTB7A* in whole blood and in esophagus mucosa. This variant was previously  
435 associated with COVID-19 hospitalization<sup>2</sup>.

436 In a second analysis, we also explored the associations across the defined admixed  
437 AMR, EUR, and AFR ancestral sources by combining through meta-analysis the  
438 SCOURGE Latin American GWAS results with the HGI studies in EUR, AFR, and  
439 admixed AMR, and excluding those from EAS and SAS (Supplementary Table 12). We  
440 refer to this as the SC-HGI<sub>3POP</sub> meta-analysis. The association at rs13003835 (*BAZZ2B*,  
441 OR=1.01, 95%CI=0.98-1.03,  $p=0.605$ ) was not replicated and rs77599934 near *DDIAS*  
442 could not be assessed, although the association at the *ZBTB7A* locus was confirmed  
443 (rs66833742, OR=0.94, 95%CI=0.92-0.96,  $p=1.89 \times 10^{-8}$ ). The variant rs76564172  
444 located near *CREBBP* also reached statistical significance (OR=1.31, 95% CI=1.25-  
445 1.38,  $p=9.64 \times 10^{-9}$ ). The sentinel variant of the region linked to *CREBBP* (in the trans-  
446 ancestry meta-analysis) was also subjected a Bayesian fine mapping (supplementary  
447 Table 6) and colocalization with eQTLs under the GTEx v8 MASHR models in lungs,  
448 esophagus mucosa, whole blood, and transformed lymphocytes. Eight variants were  
449 included in the credible set for the region in chromosome 16 (meta-analysis SC-  
450 HGI<sub>3POP</sub>), although *CREBBP* did not colocalize in any of the tissues.



451 **Polygenic risk score models**

452 Using the 49 variants associated with disease severity that are shared across populations  
453 according to the HGIv7, we constructed a polygenic risk score (PGS) model to assess its  
454 generalizability in the admixed AMR (Supplementary Table 13). First, we calculated  
455 the PGS for the SCOURGE Latin Americans and explored the association with  
456 COVID-19 hospitalization under a logistic regression model. The PGS model was  
457 associated with a 1.48-fold increase in COVID-19 hospitalization risk per every PGS  
458 standard deviation. It also contributed to explain a slightly larger variance ( $R^2=1.07\%$ )  
459 than the baseline model.

460 Subsequently, we divided the individuals into PGS deciles and percentiles to assess  
461 their risk stratification. The median percentile among controls was 40, while in cases it  
462 was 63. Those in the top PGS decile exhibited a 5.90-fold (95% CI=3.29-10.60,  
463  $p=2.79 \times 10^{-9}$ ) greater risk compared to individuals in the lowest decile, whereas the  
464 effects for the rest of the comparisons were much milder.

465 We also examined the distribution of PGS scores across a 5-level severity scale to  
466 further determine if there was any correspondence between clinical severity and genetic  
467 risk. Median PGS scores were lower in the asymptomatic and mild groups, whereas  
468 higher median scores were observed in the moderate, severe, and critical patients  
469 (Figure 4). We fitted a multinomial model using the asymptomatic class as reference  
470 and calculated the OR for each category (Supplementary Table 13), observing that the  
471 disease genetic risk was similar among asymptomatic, mild, and moderate patients.  
472 Given that the PGS was built with variants associated with critical disease and/or  
473 hospitalization and that the categories severe and critical correspond to hospitalized  
474 patients, these results underscore the ability of cross-ancestry PGS for risk stratification  
475 even in an admixed population.

476 Finally, we incorporated the novel lead SNPs from our AMR meta-analysis  
477 (rs13003835, rs2477820, and rs77599934) into the PGS model. Their inclusion in the  
478 model contributed to explain a larger variance ( $R^2=1.74\%$ ) than the model without  
479 them. This result, however, should be taken with caution given the risk of overfitting  
480 due to the use of the same subjects both for the derivation and testing of the variants.

481

## 482 **DISCUSSION**

483 We have conducted the largest GWAS meta-analysis of COVID-19 hospitalization in  
484 admixed AMR to date. While the genetic risk basis discovered for COVID-19 is largely  
485 shared among populations, trans-ancestry meta-analyses on this disease have primarily  
486 included EUR samples. This dominance of GWAS in Europeans, and the subsequent  
487 bias in sample sizes, can mask population-specific genetic risks (i.e., variants that are  
488 monomorphic in some populations) or be less powered to detect risk variants having  
489 higher allele frequencies in population groups other than Europeans. In this sense, after  
490 combining data from admixed AMR patients, we found two risk loci which are first  
491 discovered in a GWAS of Latin-American populations. Interestingly, the sentinel  
492 variant rs77599934 in the *DDIAS* gene is a rare coding variant (~1% for allele G) with a  
493 large effect on COVID-19 hospitalization that is nearly monomorphic in most of the  
494 other populations. This has likely led to its exclusion from the cross-populations meta-  
495 analyses conducted to date, remaining undetectable.

496 Fine mapping of the region harbouring *DDIAS* did not reveal further information about  
497 which gene could be the more prone to be causal, or about the functional consequences  
498 of the risk variant. However, *DDIAS*, known as damage-induced apoptosis suppressor  
499 gene, is itself a plausible candidate gene. It has been linked to DNA damage repair

500 mechanisms: research showed that depletion of *DDIAS* led to an increase of ATM  
501 phosphorylation and the formation of p53-binding protein (53BP1) foci, a known  
502 biomarker of DNA double-strand breaks, suggesting a potential role in double-strand  
503 break repair<sup>19</sup>. Similarly, elevated levels of phosphorylated nuclear histone 2AX $\gamma$  were  
504 detected after knocking down *DDIAS*, further emphasizing its role in DNA damage<sup>20</sup>.  
505 Interestingly, a study found that the infection by SARS-CoV-2 also triggered the  
506 phosphorylation of the ATM kinase and inhibited repair mechanisms, causing the  
507 accumulation of DNA damage<sup>21</sup>. This same study reported the activation of the pro-  
508 inflammatory pathway p38/MAPK by the virus, which was as well prompted after  
509 knocking-down *DDIAS*<sup>20</sup>.

510 Regarding lung function, the role of *DDIAS* in lung cancer has been widely studied. It  
511 has been proposed as a potential biomarker for lung cancer after finding that it interacts  
512 with STAT3 in lung cancer cells, regulating IL-6<sup>22,23</sup> and thus mediating inflammatory  
513 processes. Furthermore, another study determined that its blockade inhibited lung  
514 cancer cell growth<sup>20</sup>. The sentinel variant was in strong LD with an eQTL that reduced  
515 gene expression of *DDIAS* in lung, and our findings suggest that *DDIAS* gene may be  
516 indeed involved in viral response. Hence, one reasonable hypothesis is that reduced  
517 expression of *DDIAS* could potentially facilitate SARS-CoV-2 infection through the  
518 downregulation of pathways involved in DNA repairment and inflammation. Another  
519 prioritized gene from this region was *PRCP*, an angiotensinase that has been linked to  
520 hypertension and for which a hypothesis on its role on COVID-19 progression has been  
521 raised<sup>24,25</sup>.

522 The risk region found in chromosome 2 prioritized more than one gene. The lead variant  
523 rs13003835 is located within *BAZ2B*. *BAZ2B* encodes one of the regulatory subunits of  
524 the Imitation switch (ISWI) chromatin remodelers<sup>26</sup> constituting the BRF-1/BRF-5

525 complexes with SMARCA1 and SMARCA5, respectively, and the association signal  
526 colocalized with eQTLs in whole blood. The gene *LY75* (encoding the lymphocyte  
527 antigen 75) also colocalized with eQTLs in whole blood, esophagus mucosa, and lung  
528 tissues. Lymphocyte antigen 75 is involved in immune processes through antigen  
529 presentation in dendritic cells and endocytosis<sup>27</sup>, and has been associated with  
530 inflammatory diseases, representing also a compelling candidate for the region.  
531 Increased expression of *LY75* has been detected within hours after the infection by  
532 SARS-CoV-2<sup>28,29</sup>. Lastly, the signal of *CD302* colocalized in individuals with high  
533 AFR ancestral admixture in whole blood. This gene is located in the vicinity of *LY75*  
534 and both conform the readthrough *LY75-CD302*. It is worth noting that differences in  
535 AF for this variant suggest that analyses in AMR populations might be more powered to  
536 detect the association, supporting the necessity of population-specific studies.

537 A third novel risk region was observed in chromosome 15, between the genes *IQGAP1*  
538 and *ZNF774*, although not reaching genome-wide significance.

539 Secondary analyses revealed five TWAS-associated genes, some of which have been  
540 already linked to severe COVID-19. In a comprehensive multi-tissue gene expression  
541 profiling study<sup>30</sup>, decreased expression of *CAMP* and *S100A8/S100A9* genes in COVID-  
542 19 severe patients was observed, while another study detected the upregulation of  
543 *SCL25A37* among severe COVID-19 patients<sup>31</sup>. *SMARCC1* is a subunit of the SWI/SNF  
544 chromatin remodelling complex that has been identified as pro-viral for SARS-CoV-2  
545 and other coronavirus strains through a genome-wide screen<sup>32</sup>. This complex is crucial  
546 for *ACE2* expression and the viral entry in the cell<sup>33</sup>.

547 To explore the genetic architecture of the trait among admixed AMR populations, we  
548 performed two cross-ancestry meta-analyses including the SCOURGE Latin-American  
549 cohort GWAS findings. We found that the two novel risk variants did not associate with

550 COVID-19 hospitalization outside the population-specific meta-analysis, highlighting  
551 the importance of complementing trans-ancestry meta-analyses with group-specific  
552 analyses. Notably, this analysis did not replicate the association at the *DSTYK* locus,  
553 which was associated with severe COVID-19 in Brazilian individuals with higher  
554 European admixture<sup>34</sup>. This lack of replication supports the initial hypothesis of that  
555 study suggesting that the risk haplotype derived from European populations, as we have  
556 reduced the weight of this ancestral contribution in our study by excluding those  
557 individuals.

558 Moreover, these cross-ancestry meta-analyses pointed to three loci that were not  
559 genome-wide significant in the HGIv7 ALL meta-analysis: a novel locus at *CREBBP*,  
560 and two loci at *ZBTB7A* and *CASC20* that were reported in another meta-analysis.  
561 *CREBBP* and *ZBTB7A* achieved a stronger significance when considering only EUR,  
562 AFR, and admixed AMR GIA groups. According to a recent study, elevated levels of  
563 the *ZBTB7A* gene promote a quasi-homeostatic state between coronaviruses and host  
564 cells, preventing cell death by regulating oxidative stress pathways<sup>35</sup>. This gene is  
565 involved in several signalling pathways, such as B and T cell differentiation<sup>36</sup>. On a  
566 separate note, *CREBBP* encodes the CREB binding protein (CBP), involved in  
567 transcription activation, that is known to positively regulate the type I interferon  
568 response through virus-induced phosphorylation of IRF-3<sup>37</sup>. Besides, the CREBP/CBP  
569 interaction has been implicated in SARS-CoV-2 infection<sup>38</sup> via the cAMP/PKA  
570 pathway. In fact, cells with suppressed *CREBBP* gene expression exhibit reduced  
571 replication of the so called Delta and Omicron SARS-CoV-2 variants<sup>38</sup>.

572 The cross-population PGS model effectively stratified individuals based on their genetic  
573 risk and demonstrated consistency with the clinical severity classification of the  
574 patients. The inclusion of the new variants in the PGS model slightly improved the

575 predictive value of the PGS. However, it is important to confirm this last finding in an  
576 external admixed AMR cohort to address potential overfitting arising from using the  
577 same individuals both for the discovery of the associations and for testing the model.

578 This study is subject to limitations, mostly concerning the sample recruitment and  
579 composition. The SCOURGE Latino-American sample size is small and the GWAS is  
580 underpowered. Another limitation is the difference in case-control recruitment across  
581 sampling regions that, yet controlled for, may reduce the ability to observe significant  
582 associations driven by different compositions of the populations. In this sense, the  
583 identified risk loci might not replicate in a cohort lacking any of the parental population  
584 sources from the three-way admixture. Likewise, we could not explicitly control for  
585 socio-environmental factors that could have affected COVID-19 spread and  
586 hospitalization rates, although genetic principal components are known to capture non-  
587 genetic factors. Finally, we must acknowledge the lack of a replication cohort. We have  
588 used all the available GWAS data for COVID-19 hospitalization in admixed AMR in  
589 this meta-analysis due to the low number of studies conducted. Therefore, we had no  
590 studies to replicate or validate the results. These concerns may be addressed in the  
591 future by including more AMR GWAS studies in the meta-analysis, both by involving  
592 diverse populations in study designs and by supporting research from countries in Latin-  
593 America.

594 This study provides novel insights into the genetic basis of COVID-19 severity,  
595 emphasizing the importance of considering host genetic factors through using non-  
596 European populations, especially of admixed sources. Such complementary efforts can  
597 pin down new variants and increase our knowledge on the host genetic factors of severe  
598 COVID-19.

599 **Materials and methods**

600 **GWAS in Latin Americans from SCOURGE**

601 *The SCOURGE Latin American cohort*

602 A total of 3,729 of COVID-19 positive cases were recruited across five countries from  
603 Latin America (Mexico, Brazil, Colombia, Paraguay, and Ecuador) by 13 participating  
604 centres (supplementary Table 1) from March 2020 to July 2021. In addition, we  
605 included 1,082 COVID-19 positive individuals recruited between March and December  
606 2020 in Spain who either had evidence of origin from a Latin American country or  
607 showed inferred genetic admixture between AMR, EUR, and AFR (with < 0.05%  
608 SAS/EAS). These individuals were excluded from a previous SCOURGE study that  
609 focused on participants with European genetic ancestries<sup>16</sup>. We used hospitalization as a  
610 proxy for disease severity and defined as cases those COVID-19 positive patients that  
611 underwent hospitalization as a consequence of the infection and used as controls those  
612 that did not need hospitalization due to COVID-19.

613 Samples and data were collected with informed consent after the approval of the Ethics  
614 and Scientific Committees from the participating centres and by the Galician Ethics  
615 Committee Ref 2020/197. Recruitment of patients from IMSS (in Mexico, City), was  
616 approved by of the National Committee of Clinical Research, from Instituto Mexicano del  
617 Seguro Social, Mexico (protocol R-2020-785-082).

618 Samples and data were processed following normalized procedures. The REDCap  
619 electronic data capture tool<sup>39,40</sup>, hosted at Centro de Investigación Biomédica en Red  
620 (CIBER) from the Instituto de Salud Carlos III (ISCIII), was used to collect and manage  
621 demographic, epidemiological, and clinical variables. Subjects were diagnosed for  
622 COVID-19 based on quantitative PCR tests (79.3%), or according to clinical (2.2%) or  
623 laboratory procedures (antibody tests: 16.3%; other microbiological tests: 2.2%).

624 *SNP array genotyping*

625 Genomic DNA was obtained from peripheral blood and isolated using the Chemagic  
626 DNA Blood 100 kit (PerkinElmer Chemagen Technologies GmbH), following the  
627 manufacturer's recommendations.

628 Samples were genotyped with the Axiom Spain Biobank Array (Thermo Fisher  
629 Scientific) following the manufacturer's instructions in the Santiago de Compostela  
630 Node of the National Genotyping Center (CeGen-ISCI3; <http://www.usc.es/cegen>).  
631 This array contains probes for genotyping a total of 757,836 SNPs. Clustering and  
632 genotype calling were performed using the Axiom Analysis Suite v4.0.3.3 software.

633 *Quality control steps and variant imputation*

634 A quality control (QC) procedure using PLINK 1.9<sup>41</sup> was applied to both samples and  
635 the genotyped SNPs. We excluded variants with a minor allele frequency (MAF) <1%,  
636 a call rate <98%, and markers strongly deviating from Hardy-Weinberg equilibrium  
637 expectations ( $p < 1 \times 10^{-6}$ ) with mid-p adjustment. We also explored the excess of  
638 heterozygosity to discard potential cross-sample contaminations. Samples missing >2%  
639 of the variants were filtered out. Subsequently, we kept the autosomal SNPs and  
640 removed high LD regions and conducted LD-pruning (windows of 1,000 SNPs, with  
641 step size of 80 and  $r^2$  threshold of 0.1) to assess kinship and estimate the global  
642 ancestral proportions. Kinship was evaluated based on IBD values, removing one  
643 individual from each pair with  $PI\_HAT > 0.25$  that showed a Z0, Z1, and Z2 coherent  
644 pattern (according to the theoretical expected values for each relatedness level). Genetic  
645 principal components (PCs) were calculated with PLINK with the subset of LD pruned  
646 variants.



647 Genotypes were imputed with the TOPMed version r2 reference panel (GRCh38) using  
648 the TOPMed Imputation Server and variants with  $Rsq < 0.3$  or with  $MAF < 1\%$  were  
649 filtered out. A total of 4,348 individuals and 10,671,028 genetic variants were included  
650 in the analyses.

#### 651 *Genetic admixture estimation*

652 Global genetic inferred ancestry (GIA), referred to the genetic similarity to the used  
653 reference individuals, was estimated with the ADMIXTURE<sup>42</sup> v1.3 software following  
654 a two-step procedure. First, we randomly sampled 79 European (EUR) and 79 African  
655 (AFR) samples from The 1000 Genomes Project (1KGP)<sup>43</sup> and merged them with the  
656 79 Native American (AMR) samples from Mao et al.<sup>44</sup> keeping the biallelic SNPs. LD-  
657 pruned variants were selected from this merge using the same parameters as in the QC.  
658 We then run an unsupervised analysis with  $K=3$  to redefine and homogenize the clusters  
659 and to compose a refined reference for the analyses, by applying a threshold of  $\geq 95\%$   
660 of belonging to a particular cluster. As a result of this, 20 AFR, 18 EUR, and 38 AMR  
661 individuals were removed. The same LD-pruned variants data from the remaining  
662 individuals were merged with the SCOURGE Latin American cohort to perform a  
663 supervised clustering and estimated admixture proportions. A total of 471 samples from  
664 the SCOURGE cohort with  $>80\%$  estimated European GIA were removed to reduce the  
665 weight of the European ancestral component, leaving a total of 3,512 admixed  
666 American (AMR) subjects for downstream analyses.

#### 667 *Association analysis*

668 Results for the SCOURGE Latin Americans GWAS were obtained testing for COVID-  
669 19 hospitalization as a surrogate of severity. To accommodate the continuum of GIA in  
670 the cohort, we opted for a joint testing of all the individuals as a single study using a

671 mixed regression model, as this approach has demonstrated a greater power and to  
672 sufficiently control population structure<sup>45</sup>. The SCOURGE cohort consisted of 3,512  
673 COVID-19 positive patients: cases (n=1,625) were defined as hospitalized COVID-19  
674 patients and controls (n=1,887) as non-hospitalized COVID-19 positive patients.

675 Logistic mixed regression models were fitted using the SAIGEgds<sup>46</sup> package in R,  
676 which implements the two-step mixed SAIGE<sup>47</sup> model methodology and the SPA test.  
677 Baseline covariables included sex, age, and the first 10 PCs. To account for a potential  
678 heterogeneity in the recruitment and hospitalization criteria across the participating  
679 countries, we adjusted the models by groups of the recruitment areas classified in six  
680 categories: Brazil, Colombia, Ecuador, Mexico, Paraguay, and Spain. This dataset has  
681 not been used in any previously GWAS of COVID-19 published to date.

#### 682 **Meta-analysis of Latin-American populations**

683 The results of the SCOURGE Latin American cohort were meta-analyzed with the  
684 AMR HGI-B2 data, conforming our primary analysis. Summary results from the HGI  
685 freeze 7 B2 analysis corresponding to the admixed AMR population were obtained from  
686 the public repository (April 8, 2022: <https://www.covid19hg.org/results/r7/>), summing  
687 up 3,077 cases and 66,686 controls from seven contributing studies. We selected the B2  
688 phenotype definition because it offered more power and the presence of population  
689 controls not ascertained for COVID-19 does not have a drastic impact in the association  
690 results.

691 The meta-analysis was performed using an inverse-variance weighting method in  
692 METAL<sup>48</sup>. Average allele frequency was calculated and variants with low imputation  
693 quality ( $R_{sq} < 0.3$ ) were filtered out, leaving 10,121,172 variants for meta-analysis.

694 Heterogeneity between studies was evaluated with the Cochran's-Q test. The inflation  
695 of results was assessed based on a genomic control ( $\lambda$ ).

## 696 **Definition of the genetic risk loci and putative functional impact**

### 697 *Definition of lead variant and novel loci*

698 To define the lead variants in the loci that were genome-wide significant, an LD-  
699 clumping was performed on the meta-analysis data using a threshold  $p\text{-value} < 5 \times 10^{-8}$ ,  
700 clump distance = 1500 kb, independence set at a threshold  $r^2 = 0.1$  and used the  
701 SCOURGE cohort genotype data as LD reference panel. Independent loci were deemed  
702 as a novel finding if they met the following criteria: 1)  $p\text{-value} < 5 \times 10^{-8}$  in the meta-  
703 analysis and  $p\text{-value} > 5 \times 10^{-8}$  in the HGI B2 ALL meta-analysis or in the HGI B2 AMR  
704 and AFR and EUR analyses when considered by separate; 2) Cochran's Q-test for  
705 heterogeneity of effects is  $< 0.05/N_{\text{loci}}$ , where  $N_{\text{loci}}$  is the number of independent variants  
706 with  $p < 5 \times 10^{-8}$ ; and 3) the nearest gene has not been previously described in the latest  
707 HGv7 update.

### 708 *Annotation and initial mapping*

709 Functional annotation was done with FUMA<sup>49</sup> for those variants with a  $p\text{-value} < 5 \times 10^{-8}$   
710 or in moderate-to-strong LD ( $r^2 > 0.6$ ) with the lead variants, where the LD was  
711 calculated from the 1KGP AMR panel. Genetic risk loci were defined by collapsing  
712 LD-blocks within 250 kb. Then, genes, scaled CADD v1.4 scores, and RegulomeDB  
713 v1.1 scores were annotated for the resulting variants with ANNOVAR in FUMA<sup>49</sup>.  
714 Gene-based analysis was also performed using MAGMA<sup>50</sup> as implemented in FUMA,  
715 under the SNP-wide mean model using the 1KGP AMR reference panel. Significance  
716 was set at a threshold  $p < 2.66 \times 10^{-6}$  (which assumes that variants can be mapped to a total  
717 of 18,817 genes).

718 FUMA allowed us to perform an initial gene mapping by two approaches: (1) positional  
719 mapping, which assigns variants to genes by physical distance using 10-kb windows;  
720 and (2) eQTL mapping based on GTEx v.8 data from whole blood, lungs, lymphocytes,  
721 and oesophagus mucosa tissues, establishing a False Discovery Rate (FDR) of 0.05 to  
722 declare significance for variant-gene pairs.

723 Subsequently, to assign the variants to the most likely gene driving the association, we  
724 refined the candidate genes by fine mapping the discovered regions and implementing  
725 functional mapping.

726 To conduct a Bayesian fine mapping, credible sets for the genetic loci considered novel  
727 findings were calculated on the results from each of the three meta-analyses to identify a  
728 subset of variants most likely containing the causal variant at 95% confidence level,  
729 assuming that there is a single causal variant and that it has been tested. We used  
730 *corrcoverage* (<https://cran.rstudio.com/web/packages/corrcoverage/index.html>) for R to  
731 calculate the posterior probabilities of the variant being causal for all variants with an  
732  $r^2 > 0.1$  with the leading SNP and within 1 Mb except for the novel variant in  
733 chromosome 19, for which we used a window of 0.5 Mb. Variants were added to the  
734 credible set until the sum of the posterior probabilities was  $\geq 0.95$ . VEP  
735 (<https://www.ensembl.org/info/docs/tools/vep/index.html>) and the V2G aggregate  
736 scoring from Open Targets Genetics (<https://genetics.opentargets.org>) were used to  
737 annotate the biological function of the variants contained in the fine-mapped credible  
738 sets

### 739 *Colocalization analysis*

740 We also conducted colocalization analyses to identify the putative causal genes that  
741 could act through the regulation of gene expression. FUMA's eQTL mapping enabled

742 the identification of genes whose expression was associated with the variants in whole  
743 blood, lungs, lymphocytes, and oesophagus mucosa tissues. We combined this  
744 information with the VEP and V2G aggregate scoring to prioritize genes. For the fine-  
745 mapping regions, we included the variants within the calculated credible sets. In the  
746 cases where the fine mapping was unsuccessful, we considered variants within a 0.2 Mb  
747 window of the lead variant.

748 For each prioritized gene, we then run COLOC<sup>51</sup> to assess the evidence of  
749 colocalization between association signals and the eQTLs in each tissue, when at least  
750 one variant overlapped between them. COLOC estimates the posterior probability of  
751 two traits sharing the same causal variant in a locus. Prior probabilities of a variant  
752 being associated to COVID-19 phenotype (p1) and gene expression (p2) were set at  
753  $1 \times 10^{-4}$ , while pp2 was set at  $1 \times 10^{-6}$  as they are robust thresholds<sup>52</sup>. The posterior  
754 probability of colocalization (PP4) > 0.75 and a ratio PP4/PP3 > 3 were used as the  
755 criteria to support evidence of colocalization. Additionally, a threshold of PP4.SNP > 0.5  
756 was chosen for causal variant prioritization. In cases where colocalization of a single  
757 variant failed, we computed the 95% credible sets. The eQTL data was retrieved from  
758 GTEx v8 and only significant variant-gene pairs were considered in the analyses.

759 Colocalization in whole-blood was also performed using the recent published gene  
760 expression datasets derived from a cohort of African Americans, Puerto Ricans, and  
761 Mexican Americans (GALA II-SAGE)<sup>53</sup>. We used the results from the pooled cohort  
762 for the three discovered loci, and from the AFRHp5 (African genetic ancestry > 50%)  
763 and IAMHp5 (Native American genetic ancestry > 50%) cohorts for the risk loci in  
764 chromosomes 2 and 11. Results are shown in the Supplementary Table 10.

765 Sensitivity plots are shown in supplementary Figures 4 and 5.

## 766 **Transcription-wide association studies**

767 Transcriptome-wide association studies (TWAS) were conducted using the pretrained  
768 prediction models with MASHR-computed effect sizes on GTEx v8 datasets<sup>54,55</sup>.  
769 Results from the Latin-American meta-analysis were harmonized and integrated with  
770 the prediction models through S-PrediXcan<sup>56</sup> for lungs, whole blood, lymphocytes and  
771 oesophagus mucosa tissues. Statistical significance was set at  $p\text{-value} < 0.05$  divided by  
772 the number of genes that were tested for each tissue. Subsequently, we leveraged results  
773 for all 49 tissues and run a multi-tissue TWAS to improve power for association, as  
774 demonstrated recently<sup>57</sup>. TWAS was also conducted with the MASHR models for  
775 whole-blood in the pooled admixed AMR from the GALA and SAGE studies<sup>53</sup>.

## 776 **Cross-population meta-analyses**

777 We conducted two additional meta-analyses to investigate the ability of combining  
778 populations to replicate our discovered risk loci. This methodology enabled the  
779 comparison of effects and the significance of associations in the novel risk loci between  
780 the results from analyses that included or excluded other population groups.

781 The first meta-analysis comprised the five populations analysed within HGI (B2-ALL).  
782 Additionally, to evaluate the three GIA components within the SCOURGE Latin-  
783 American cohort<sup>58</sup>, we conducted a meta-analysis of the admixed AMR, EUR, and AFR  
784 cohorts (B2). All summary statistics were retrieved from the HGI repository. We  
785 applied the same meta-analysis methodology and filters as in the admixed AMR meta-  
786 analysis. Novel variants from these meta-analyses were fine-mapped and colocalized  
787 with gene expression.

## 788 **Cross-population Polygenic Risk Score**

789 A polygenic risk score (PGS) for critical COVID-19 was derived combining the  
790 variants associated with hospitalization or disease severity that have been discovered to  
791 date. We curated a list of lead variants that were: 1) associated to either severe disease  
792 or hospitalization in the latest HGIv7 release<sup>1</sup> (using the hospitalization weights); or 2)  
793 associated to severe disease in the latest GenOMICC meta-analysis<sup>2</sup> that were not  
794 reported in the latest HGI release. A total of 49 markers were used in the PGS model  
795 (see supplementary Table 13) since two variants were absent from our study.

796 Scores were calculated and normalized for the SCOURGE Latin-American cohort with  
797 PLINK 1.9. This cross-ancestry PGS was used as a predictor for hospitalization  
798 (COVID-19 positive that were hospitalized vs. COVID-19 positive that did not  
799 necessitate hospital admission) by fitting a logistic regression model. Prediction  
800 accuracy for the PGS was assessed by performing 500 bootstrap resamples of the  
801 increase in the pseudo-R-squared. We also divided the sample in deciles and percentiles  
802 to assess risk stratification. The models were fit for the dependent variable adjusting for  
803 sex, age, the first 10 PCs, and the sampling region (in the Admixed AMR cohort) with  
804 and without the PGS, and the partial pseudo-R<sup>2</sup> was computed and averaged among the  
805 resamples.

806 A clinical severity scale was used in a multinomial regression model to further evaluate  
807 the power of this cross-ancestry PGS for risk stratification. This severity strata were  
808 defined as follows: 0) asymptomatic; 1) mild, that is, with symptoms, but without  
809 pulmonary infiltrates or need of oxygen therapy; 2) moderate, that is, with pulmonary  
810 infiltrates affecting <50% of the lungs or need of supplemental oxygen therapy; 3)  
811 severe disease, that is with hospital admission and PaO<sub>2</sub><65 mmHg or SaO<sub>2</sub><90%,  
812 PaO<sub>2</sub>/FiO<sub>2</sub><300, SaO<sub>2</sub>/FiO<sub>2</sub><440, dyspnea, respiratory frequency≥22 bpm, and  
813 infiltrates affecting >50% of the lungs; and 4) critical disease, that is with an admission

814 to the ICU or need of mechanical ventilation (invasive or non-invasive). We also  
815 included the novel risk variants as predictors alongside the PRS to determine if they  
816 provided increased prediction ability.

### 817 **Data availability**

818 Summary statistics from the SCOURGE Latin-American GWAS will be available at  
819 <https://github.com/CIBERER/Scourge-COVID19>.

820

### 821 **Funding**

822 Instituto de Salud Carlos III (COV20\_00622 to A.C., COV20/00792 to M.B.,  
823 COV20\_00181 to C.A., COV20\_1144 to M.A.J.S. and A.F.R., PI20/00876 to C.F.);  
824 European Union (ERDF) ‘A way of making Europe’. Fundación Amancio Ortega,  
825 Banco de Santander (to A.C.), Estrella de Levante S.A. and Colabora Mujer Association  
826 (to E.G.-N.) and Obra Social La Caixa (to R.B.); Agencia Estatal de Investigación  
827 (RTC-2017-6471-1 to C.F.), Cabildo Insular de Tenerife (CGIEU0000219140  
828 ‘Apuestas científicas del ITER para colaborar en la lucha contra la COVID-19’ to C.F.)  
829 and Fundación Canaria Instituto de Investigación Sanitaria de Canarias (PIFIISC20/57  
830 to C.F.).

831 SD-DA was supported by a Xunta de Galicia predoctoral fellowship.

### 832 **Author contributions**

833 Study design: RC, AC, CF. Data collection: SCOURGE cohort group. Data analysis:  
834 SD-DA, RC, ADL, CF, JML-S. Interpretation: SD-DA, RC, ADL. Drafting of the  
835 manuscript: SD-DA, RC, ADL, CF, AR-M, AC. Critical revision of the manuscript:



836 SD-DA, RC, ADL, AC, CF, JAR, AR-M, PL. Approval of the final version of the  
837 publication: all co-authors.

### 838 **Acknowledgements**

839 The contribution of the Centro Nacional de Genotipado (CEGEN), and Centro de  
840 Supercomputación de Galicia (CESGA) for funding this project by providing  
841 supercomputing infrastructures, is also acknowledged. Authors are also particularly  
842 grateful for the supply of material and the collaboration of patients, health professionals  
843 from participating centers and biobanks. Namely Biobanc-Mur, and biobanks of the  
844 Complejo Hospitalario Universitario de A Coruña, Complejo Hospitalario  
845 Universitario de Santiago, Hospital Clínico San Carlos, Hospital La Fe, Hospital  
846 Universitario Puerta de Hierro Majadahonda—Instituto de Investigación Sanitaria  
847 Puerta de Hierro—Segovia de Arana, Hospital Ramón y Cajal, IDIBGI, IdISBa, IIS  
848 Biocruces Bizkaia, IIS Galicia Sur. Also biobanks of the Sistema de Salud de Aragón,  
849 Sistema Sanitario Público de Andalucía, and Banco Nacional de ADN.

850

### 851 **References**

- 852 1. Initiative, T. C.-19 H. G. & Ganna, A. A second update on mapping the human genetic  
853 architecture of COVID-19. 2022.12.24.22283874 Preprint at  
854 <https://doi.org/10.1101/2022.12.24.22283874> (2023).
- 855 2. GWAS and meta-analysis identifies 49 genetic variants underlying critical COVID-19 |  
856 Nature. <https://www.nature.com/articles/s41586-023-06034-3>.
- 857 3. Niemi, M. E. K. *et al.* Mapping the human genetic architecture of COVID-19. *Nature*  
858 **600**, 472–477 (2021).
- 859 4. Popejoy, A. B. & Fullerton, S. M. Genomics is failing on diversity. *Nature* **538**, 161–164  
860 (2016).
- 861 5. Sirugo, G., Williams, S. M. & Tishkoff, S. A. The Missing Diversity in Human Genetic  
862 Studies. *Cell* **177**, 26–31 (2019).

- 863 6. Li, Y. R. & Keating, B. J. Trans-ethnic genome-wide association studies: advantages and  
864 challenges of mapping in diverse populations. *Genome Med.* **6**, 91 (2014).
- 865 7. Rosenberg, N. A. *et al.* Genome-wide association studies in diverse populations. *Nat.*  
866 *Rev. Genet.* **11**, 356–366 (2010).
- 867 8. Kwok, A. J., Mentzer, A. & Knight, J. C. Host genetics and infectious disease: new tools,  
868 insights and translational opportunities. *Nat. Rev. Genet.* **22**, 137–153 (2021).
- 869 9. Karlsson, E. K., Kwiatkowski, D. P. & Sabeti, P. C. Natural selection and infectious  
870 disease in human populations. *Nat. Rev. Genet.* **15**, 379–393 (2014).
- 871 10. Namkoong, H. *et al.* DOCK2 is involved in the host genetics and biology of severe  
872 COVID-19. *Nature* **609**, 754–760 (2022).
- 873 11. Bastard, P. *et al.* A loss-of-function IFNAR1 allele in Polynesia underlies severe viral  
874 diseases in homozygotes. *J. Exp. Med.* **219**, e20220028 (2022).
- 875 12. Duncan, C. J. A. *et al.* Life-threatening viral disease in a novel form of autosomal  
876 recessive IFNAR2 deficiency in the Arctic. *J. Exp. Med.* **219**, e20212427 (2022).
- 877 13. Peterson, R. E. *et al.* Genome-wide Association Studies in Ancestrally Diverse  
878 Populations: Opportunities, Methods, Pitfalls, and Recommendations. *Cell* **179**, 589–603  
879 (2019).
- 880 14. Mester, R. *et al.* Impact of cross-ancestry genetic architecture on GWAS in admixed  
881 populations. 2023.01.20.524946 Preprint at <https://doi.org/10.1101/2023.01.20.524946>  
882 (2023).
- 883 15. Tractor uses local ancestry to enable the inclusion of admixed individuals in GWAS and  
884 to boost power | Nature Genetics. <https://www.nature.com/articles/s41588-020-00766-y>.
- 885 16. Cruz, R. *et al.* Novel genes and sex differences in COVID-19 severity. *Hum. Mol. Genet.*  
886 **31**, 3789–3806 (2022).
- 887 17. Degenhardt, F. *et al.* Detailed stratified GWAS analysis for severe COVID-19 in four  
888 European populations. *Hum. Mol. Genet.* **31**, 3945–3966 (2022).
- 889 18. Whole-genome sequencing reveals host factors underlying critical COVID-19 | Nature.  
890 <https://www.nature.com/articles/s41586-022-04576-6>.
- 891 19. Evolution-based screening enables genome-wide prioritization and discovery of DNA  
892 repair genes | PNAS. <https://www.pnas.org/doi/full/10.1073/pnas.1906559116>.
- 893 20. Human Noxin is an anti-apoptotic protein in response to DNA damage of A549  
894 non-small cell lung carcinoma - Won - 2014 - International Journal of Cancer - Wiley Online  
895 Library. <https://onlinelibrary.wiley.com/doi/10.1002/ijc.28600>.
- 896 21. Gioia, U. *et al.* SARS-CoV-2 infection induces DNA damage, through CHK1 degradation  
897 and impaired 53BP1 recruitment, and cellular senescence. *Nat. Cell Biol.* **25**, 550–564 (2023).
- 898 22. Im, J.-Y. *et al.* DDIAS promotes STAT3 activation by preventing STAT3 recruitment to  
899 PTPRM in lung cancer cells. *Oncogenesis* **9**, 1–11 (2020).

- 900 23. Im, J.-Y., Kang, M.-J., Kim, B.-K. & Won, M. DDIAS, DNA damage-induced apoptosis  
901 suppressor, is a potential therapeutic target in cancer. *Exp. Mol. Med.* 1–7 (2023)  
902 doi:10.1038/s12276-023-00974-6.
- 903 24. Angeli, F. *et al.* The spike effect of acute respiratory syndrome coronavirus 2 and  
904 coronavirus disease 2019 vaccines on blood pressure. *Eur. J. Intern. Med.* **109**, 12–21 (2023).
- 905 25. Silva-Aguiar, R. P. *et al.* Role of the renin-angiotensin system in the development of  
906 severe COVID-19 in hypertensive patients. *Am. J. Physiol.-Lung Cell. Mol. Physiol.* **319**, L596–  
907 L602 (2020).
- 908 26. Li, Y. *et al.* The emerging role of ISWI chromatin remodeling complexes in cancer. *J.*  
909 *Exp. Clin. Cancer Res.* **40**, 346 (2021).
- 910 27. The Dendritic Cell Receptor for Endocytosis, Dec-205, Can Recycle and Enhance  
911 Antigen Presentation via Major Histocompatibility Complex Class II–Positive Lysosomal  
912 Compartments | Journal of Cell Biology | Rockefeller University Press.  
913 [https://rupress.org/jcb/article/151/3/673/21295/The-Dendritic-Cell-Receptor-for-Endocytosis-](https://rupress.org/jcb/article/151/3/673/21295/The-Dendritic-Cell-Receptor-for-Endocytosis-Dec)  
914 Dec.
- 915 28. Sims, A. C. *et al.* Release of Severe Acute Respiratory Syndrome Coronavirus Nuclear  
916 Import Block Enhances Host Transcription in Human Lung Cells. *J. Virol.* **87**, 3885–3902 (2013).
- 917 29. A Network Integration Approach to Predict Conserved Regulators Related to  
918 Pathogenicity of Influenza and SARS-CoV Respiratory Viruses | PLOS ONE.  
919 <https://journals.plos.org/plosone/article?id=10.1371/journal.pone.0069374>.
- 920 30. Gómez-Carballa, A. *et al.* A multi-tissue study of immune gene expression profiling  
921 highlights the key role of the nasal epithelium in COVID-19 severity. *Environ. Res.* **210**, 112890  
922 (2022).
- 923 31. Policard, M., Jain, S., Rego, S. & Dakshanamurthy, S. Immune characterization and  
924 profiles of SARS-CoV-2 infected patients reveals potential host therapeutic targets and SARS-  
925 CoV-2 oncogenesis mechanism. *Virus Res.* **301**, 198464 (2021).
- 926 32. Wei, J. *et al.* Genome-wide CRISPR Screens Reveal Host Factors Critical for SARS-CoV-2  
927 Infection. *Cell* **184**, 76-91.e13 (2021).
- 928 33. Wei, J. *et al.* Pharmacological disruption of mSWI/SNF complex activity restricts SARS-  
929 CoV-2 infection. *Nat. Genet.* **55**, 471–483 (2023).
- 930 34. Pereira, A. C. *et al.* Genetic risk factors and COVID-19 severity in Brazil: results from  
931 BRACOVID study. *Hum. Mol. Genet.* **31**, 3021–3031 (2022).
- 932 35. Zhu, X. *et al.* ZBTB7A promotes virus-host homeostasis during human coronavirus 229E  
933 infection. *Cell Rep.* **41**, 111540 (2022).
- 934 36. Gupta, S. *et al.* Emerging role of ZBTB7A as an oncogenic driver and transcriptional  
935 repressor. *Cancer Lett.* **483**, 22–34 (2020).
- 936 37. Yoneyama, M. *et al.* Direct triggering of the type I interferon system by virus infection:  
937 activation of a transcription factor complex containing IRF-3 and CBP/p300. *EMBO J.* **17**, 1087–  
938 1095 (1998).

- 939 38. Yang, Q. *et al.* SARS-CoV-2 infection activates CREB/CBP in cellular cyclic AMP-  
940 dependent pathways. *J. Med. Virol.* **95**, e28383 (2023).
- 941 39. Harris, P. A. *et al.* Research electronic data capture (REDCap)—A metadata-driven  
942 methodology and workflow process for providing translational research informatics support. *J.*  
943 *Biomed. Inform.* **42**, 377–381 (2009).
- 944 40. Harris, P. A. *et al.* The REDCap consortium: Building an international community of  
945 software platform partners. *J. Biomed. Inform.* **95**, 103208 (2019).
- 946 41. Purcell, S. *et al.* PLINK: A Tool Set for Whole-Genome Association and Population-  
947 Based Linkage Analyses. *Am. J. Hum. Genet.* **81**, 559–575 (2007).
- 948 42. Alexander, D. H., Novembre, J. & Lange, K. Fast model-based estimation of ancestry in  
949 unrelated individuals. *Genome Res.* **19**, 1655–1664 (2009).
- 950 43. Auton, A. *et al.* A global reference for human genetic variation. *Nature* **526**, 68–74  
951 (2015).
- 952 44. Mao, X. *et al.* A Genomewide Admixture Mapping Panel for Hispanic/Latino  
953 Populations. *Am. J. Hum. Genet.* **80**, 1171–1178 (2007).
- 954 45. Wojcik, G. L. *et al.* Genetic analyses of diverse populations improves discovery for  
955 complex traits. *Nature* **570**, 514–518 (2019).
- 956 46. Zheng, X. & Davis, J. W. SAIGEgds—an efficient statistical tool for large-scale PheWAS  
957 with mixed models. *Bioinformatics* **37**, 728–730 (2021).
- 958 47. Zhou, W. *et al.* Efficiently controlling for case-control imbalance and sample  
959 relatedness in large-scale genetic association studies. *Nat. Genet.* **50**, 1335–1341 (2018).
- 960 48. METAL: fast and efficient meta-analysis of genomewide association scans |  
961 Bioinformatics | Oxford Academic.  
962 <https://academic.oup.com/bioinformatics/article/26/17/2190/198154>.
- 963 49. Watanabe, K., Taskesen, E., van Bochoven, A. & Posthuma, D. Functional mapping and  
964 annotation of genetic associations with FUMA. *Nat. Commun.* **8**, 1826 (2017).
- 965 50. MAGMA: Generalized Gene-Set Analysis of GWAS Data | PLOS Computational Biology.  
966 <https://journals.plos.org/ploscompbiol/article?id=10.1371/journal.pcbi.1004219>.
- 967 51. Giambartolomei, C. *et al.* Bayesian Test for Colocalisation between Pairs of Genetic  
968 Association Studies Using Summary Statistics. *PLOS Genet.* **10**, e1004383 (2014).
- 969 52. Wallace, C. Eliciting priors and relaxing the single causal variant assumption in  
970 colocalisation analyses. *PLOS Genet.* **16**, e1008720 (2020).
- 971 53. Kachuri, L. *et al.* Gene expression in African Americans, Puerto Ricans and Mexican  
972 Americans reveals ancestry-specific patterns of genetic architecture. *Nat. Genet.* **55**, 952–963  
973 (2023).
- 974 54. Barbeira, A. N. *et al.* Exploiting the GTEx resources to decipher the mechanisms at  
975 GWAS loci. *Genome Biol.* **22**, 49 (2021).
- 976 55. Barbeira, A. N. *et al.* GWAS and GTEx QTL integration. (2019)  
977 doi:10.5281/zenodo.3518299.

978 56. Barbeira, A. N. *et al.* Exploring the phenotypic consequences of tissue specific gene  
 979 expression variation inferred from GWAS summary statistics. *Nat. Commun.* **9**, 1825 (2018).

980 57. Barbeira, A. N. *et al.* Integrating predicted transcriptome from multiple tissues  
 981 improves association detection. *PLoS Genet.* **15**, e1007889 (2019).

982 58. Genome-wide patterns of population structure and admixture among Hispanic/Latino  
 983 populations | PNAS. [https://www.pnas.org/doi/10.1073/pnas.0914618107?url\\_ver=Z39.88-](https://www.pnas.org/doi/10.1073/pnas.0914618107?url_ver=Z39.88-2003&rfr_id=ori:rid:crossref.org&rfr_dat=cr_pub%20%20pubmed)  
 984 [2003&rfr\\_id=ori:rid:crossref.org&rfr\\_dat=cr\\_pub%20%20pubmed.](https://www.pnas.org/doi/10.1073/pnas.0914618107?url_ver=Z39.88-2003&rfr_id=ori:rid:crossref.org&rfr_dat=cr_pub%20%20pubmed)

985

986

987 Table 1. Demographic characteristics of the SCOURGE Latin-American cohort.

| Variable                  | Non Hospitalized<br>N = 1,887 | Hospitalized<br>N = 1,608 |
|---------------------------|-------------------------------|---------------------------|
| Age – mean years ± SD     | 39.1 ± 11.9                   | 54.1 ± 14.5               |
| Sex - N (%)               |                               |                           |
| Female (%)                | 1253 (66.4)                   | 668 (41.5)                |
| GIA* – % mean ±SD         |                               |                           |
| European                  | 54.4 ± 16.2                   | 39.4 ± 20.7               |
| African                   | 15.3 ± 12.7                   | 9.1 ± 11.6                |
| Native American           | 30.3 ± 19.8                   | 51.46 ± 26.5              |
| Comorbidities - N (%)     |                               |                           |
| Vascular/endocrinological | 488 (25.9)                    | 873 (54.3)                |
| Cardiac                   | 60 (3.2)                      | 150 (9.3)                 |
| Nervous                   | 15 (0.8)                      | 61 (3.8)                  |
| Digestive                 | 14 (0.7)                      | 33 (2.0)                  |
| Onco-hematological        | 21 (1.1)                      | 48 (3.00)                 |
| Respiratory               | 76 (4.0)                      | 118 (7.3)                 |

988 \*Global genetic inferred ancestry.

989

990 Table 2. Lead independent variants in the admixed AMR GWAS meta-analysis.

| SNP rsID | chr:pos | EA | NEA | OR (95% CI) | P-value | EAF   | EAF      | Nearest |
|----------|---------|----|-----|-------------|---------|-------|----------|---------|
|          |         |    |     |             |         | cases | controls | gene    |

|                   |             |   |   |                  |          |       |       |                  |
|-------------------|-------------|---|---|------------------|----------|-------|-------|------------------|
| <i>rs13003835</i> | 2:159407982 | T | C | 1.20 (1.12-1.27) | 3.66E-08 | 0.563 | 0.429 | <i>BAZ2B</i>     |
| <i>rs35731912</i> | 3:45848457  | T | C | 1.65 (1.47-1.85) | 6.30E-17 | 0.087 | 0.056 | <i>LZTFL1</i>    |
| <i>rs2477820</i>  | 6:41535254  | A | T | 0.84 (0.79-0.89) | 1.89E-08 | 0.453 | 0.517 | <i>FOXP4-AS1</i> |
| <i>rs77599934</i> | 11:82906875 | G | A | 2.27 (1.7-3.04)  | 2.26E-08 | 0.016 | 0.011 | <i>DDIAS</i>     |

991 EA: effect allele; NEA: non-effect allele; EAF: effect allele frequency in the SCOURGE study.

992

993 Table 3. Novel variants in the SC-HGI<sub>ALL</sub> and SC-HGI<sub>3POP</sub> meta-analyses (with respect

994 to HGIv7). Independent signals after LD clumping.

| <i>SNP rsID</i>   | <i>chr:pos</i> | <i>EA</i> | <i>NEA</i> | <i>OR (95% CI)</i> | <i>P-value</i> | <i>Nearest gene</i> | <i>Analysis</i>        |
|-------------------|----------------|-----------|------------|--------------------|----------------|---------------------|------------------------|
| <i>rs76564172</i> | 16:3892266     | T         | G          | 1.31 (1.19-1.44)   | 9.64E-09       | <i>CREBBP</i>       | SC-HGI <sub>3POP</sub> |
| <i>rs66833742</i> | 19:4063488     | T         | C          | 0.94 (0.92-0.96)   | 1.89E-08       | <i>ZBTB7A</i>       | SC-HGI <sub>3POP</sub> |
| <i>rs66833742</i> | 19:4063488     | T         | C          | 0.94 (0.92-0.96)   | 2.50E-08       | <i>ZBTB7A</i>       | SC-HGI <sub>ALL</sub>  |
| <i>rs2876034</i>  | 20:6492834     | A         | T          | 0.95 (0.93-0.97)   | 2.83E-08       | <i>CASC20</i>       | SC-HGI <sub>ALL</sub>  |

995 EA: effect allele; NEA: non-effect allele.

996

997 **Figure 1. Flow chart of this study.**

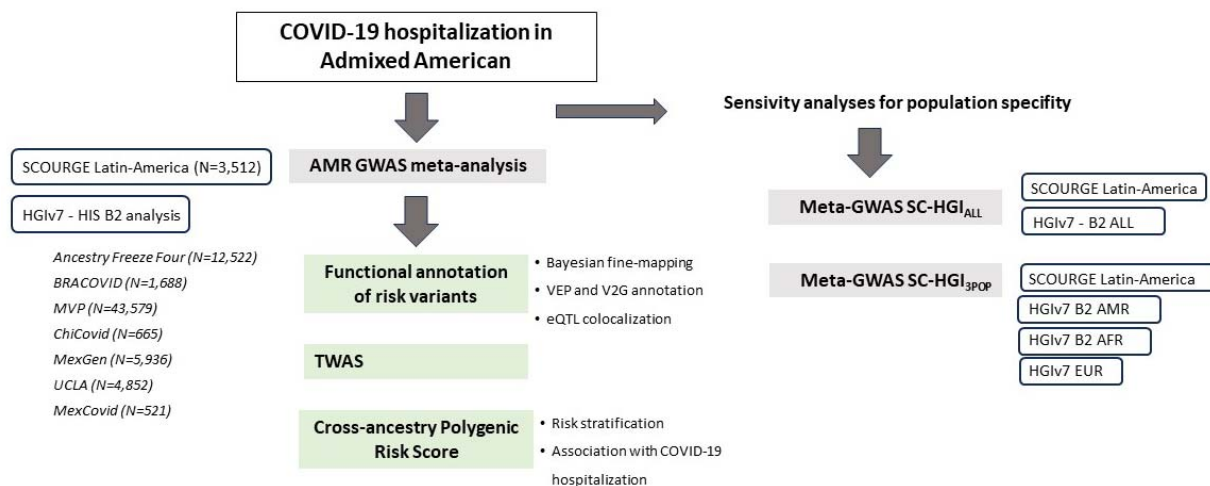

998

999

1000

1001

1002 Figure 2. A) Manhattan plot for the admixed AMR GWAS meta-analysis. Probability  
1003 thresholds at  $p=5 \times 10^{-8}$  and  $p=5 \times 10^{-5}$  are indicated by the horizontal lines. Genome-wide  
1004 significant associations with COVID-19 hospitalizations were found in chromosome 2  
1005 (within *BAZ2B*), chromosome 3 (within *LZTFL1*), chromosome 6 (within *FOXP4*), and  
1006 chromosome 11 (within *DDIAS*). A Quantile-Quantile plot is shown in supplementary  
1007 Figure 2. B) Regional association plots for rs1003835 at chromosome 2 and rs7759934  
1008 at chromosome 11; C) Allele frequency distribution across The 1000 Genomes Project  
1009 populations for the lead variants rs1003835 and rs7759934.

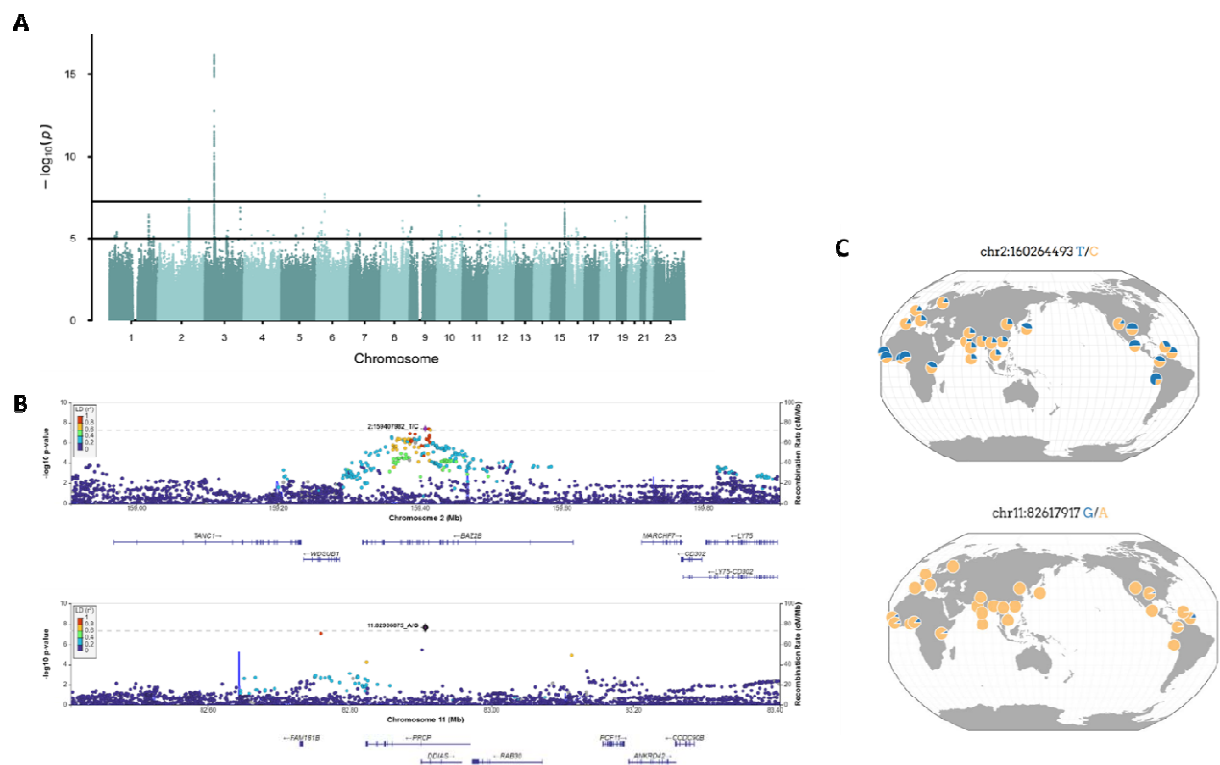

1010

1011

1012 Figure 3. Forest plot showing effect sizes and the corresponding confidence intervals for  
1013 the sentinel variants identified in the AMR meta-analysis across populations. All beta  
1014 values with their corresponding CIs were retrieved from the B2 population-specific  
1015 meta-analysis from the HGI v7 release, except for AMR, for which the beta value and  
1016 IC from the HGI<sub>AMR</sub>-SCOURGE meta-analysis is represented.  
1017

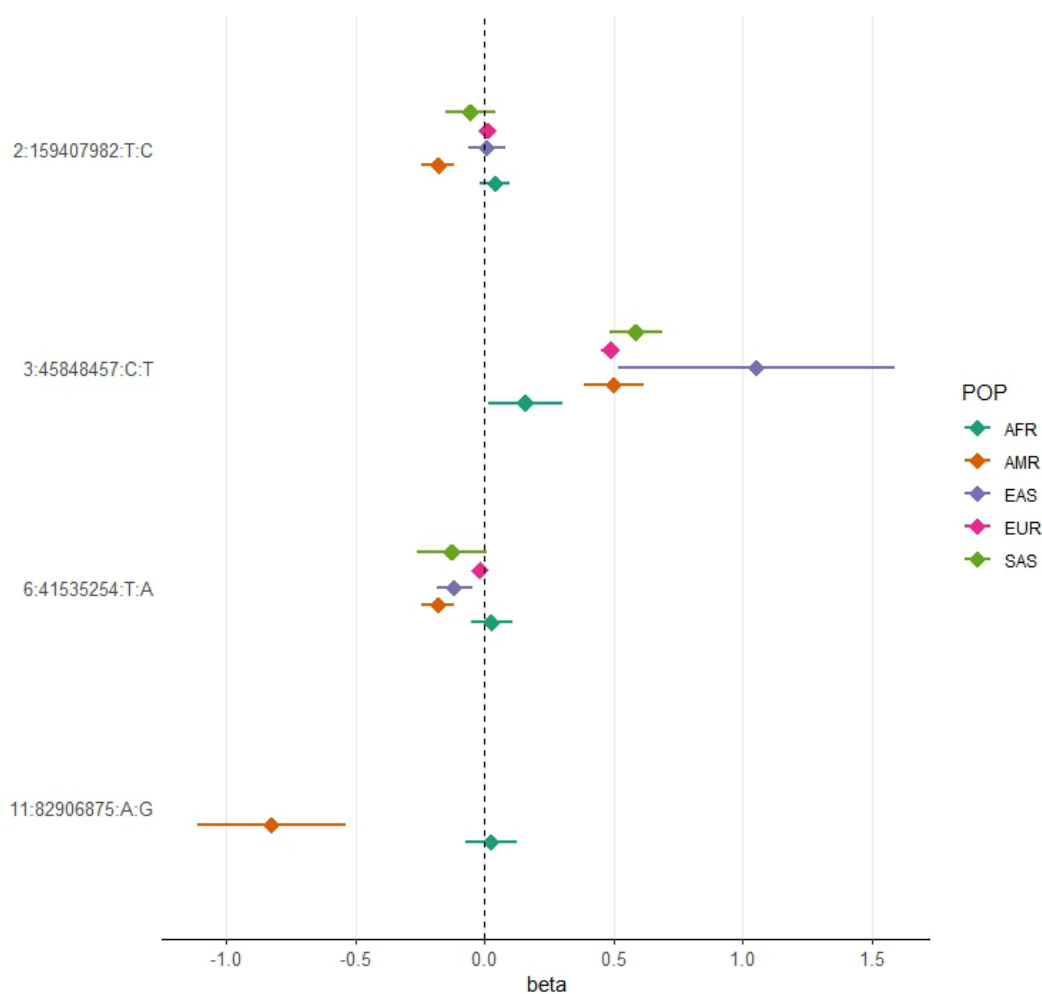

1018

1019

1020 Figure 4. (A) Polygenic risk stratified by PGS deciles comparing each risk group  
1021 against the lowest risk group (OR-95%CI); (B) Distribution of the PGS scores in each



1022 of the severity scale classes (0-Asymptomatic, 1-Mild disease, 2-Moderate disease, 3-  
1023 Severe disease, 4-Critical disease).

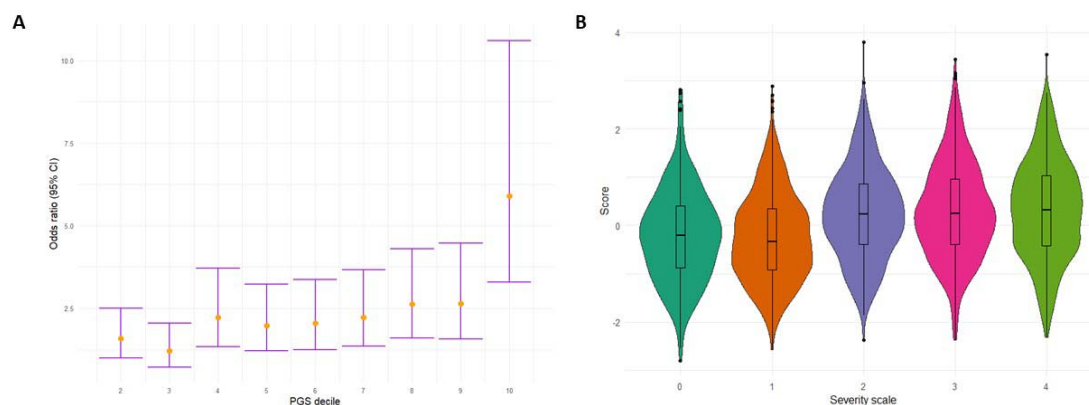

1024

1025

1026

1027 **Supplementary Material for: Novel risk loci for COVID-19 hospitalization among**  
1028 **admixed American populations**

1029 Supplementary Tables are provided in a separate excel file

1030 **Supplementary figures**

1031 **Supplementary Figure 1. Global Genetic Inferred Ancestry (GIA) composition in**  
1032 **the SCOURGE Latin-American cohort.** European (EUR), African (AFR) and Native  
1033 American (AMR) GIA was derived with ADMIXTURE from a reference panel  
1034 composed of Aymaran, Mayan, Nahuatl, and Quechuan individuals of Native-American  
1035 genetic ancestry and randomly selected samples from the EUR and AFR 1KGP  
1036 populations. The colours represent the different geographical sampling regions from  
1037 which the admixed American individuals from SCOURGE were recruited.

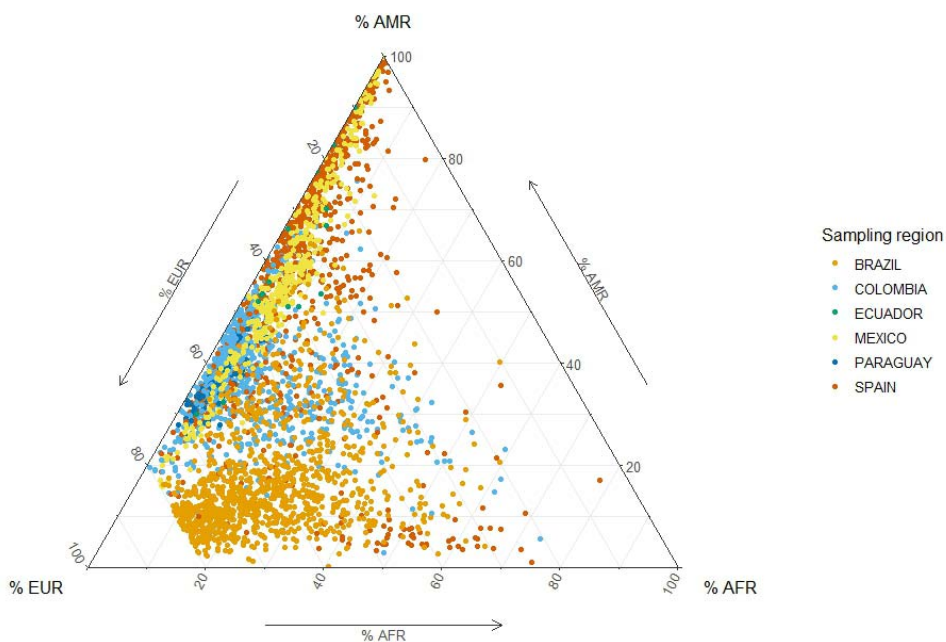

1038

1039

1040 **Supplementary Figure 2. Quantile-Quantile plot for the AMR GWAS meta-**  
1041 **analysis.** A lambda inflation factor of 1.015 was obtained.

1042

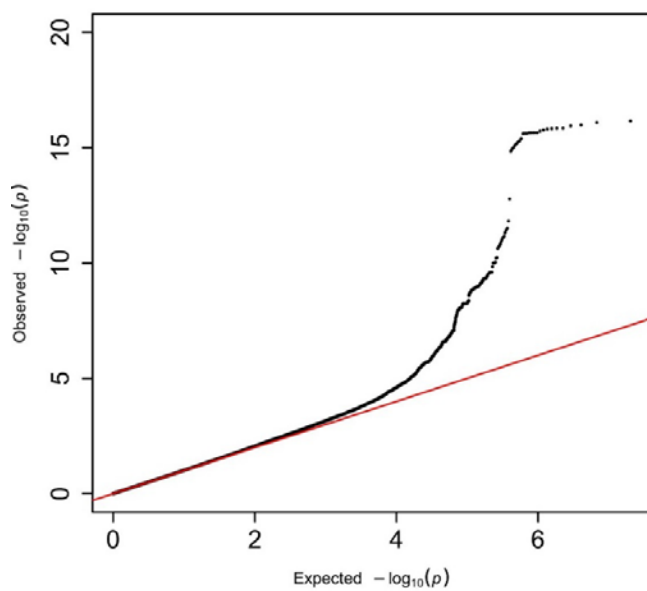

1043

1044

1045

1046

1047

1048

1049

1050

1051

1052

1053

1054 **Supplementary Figure 3. Regional association plots for the fine mapped loci in**  
1055 **chromosomes 2 (upper panel) and 16 (lower panel).** Coloured in red, the variants  
1056 allocated to the credible set at the 95% confidence according to the Bayesian fine  
1057 mapping. In blue, the sentinel variant.

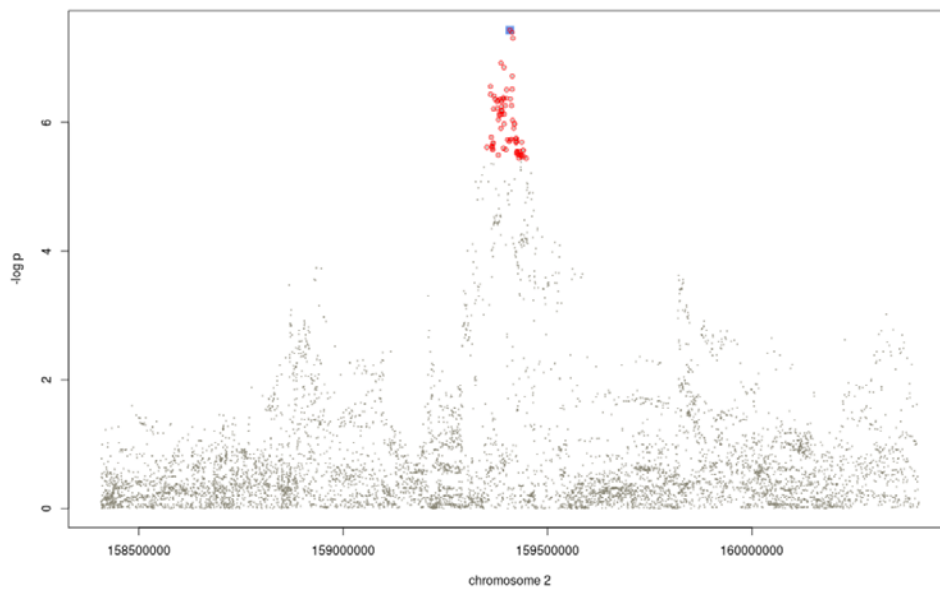

1058

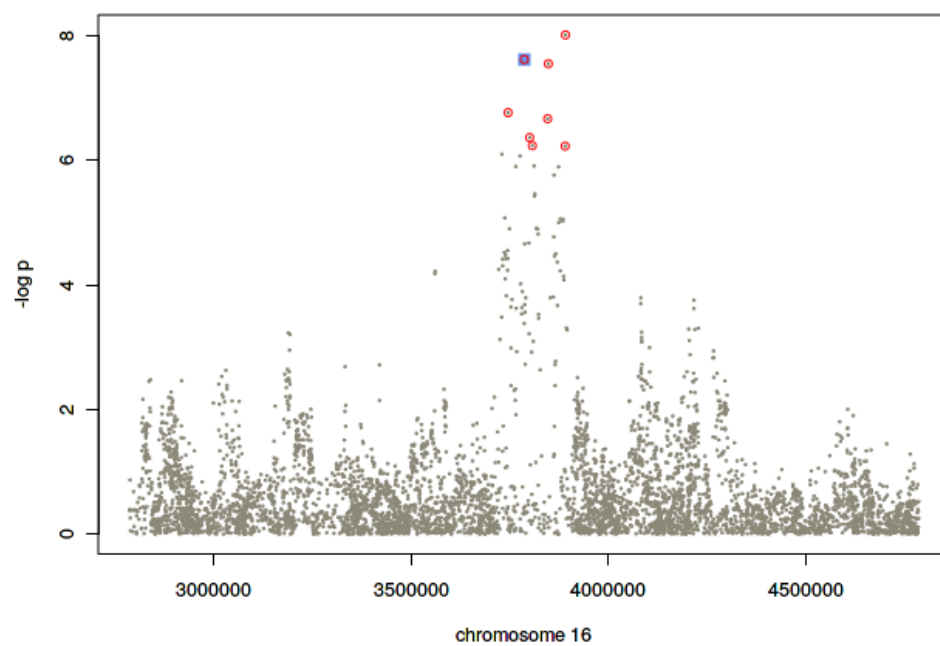

1059

1060

1061 **Supplementary Figure 4. Sensitivity plots from COLOC with expression data from**  
1062 **GTEx v8.** The range of  $p_{12}$  values (probability that a SNP is associated with both

1063 traits) for which the rule  $H_4 > 0.7$  is supported is shown in green in the right plots for

1064 each analysis. Plots in the left represent the variants included in the risk region common

1065 to both traits along their individual association  $-\log_{10}(p)$  for each trait, whereas

1066 the shading shows the posterior probability that the SNP is causal given  $H_4$  is true. Trait

1067 1 corresponds to COVID-19 hospitalization, while trait 2 corresponds to gene

1068 expression in each analysis.

1069

### LY75 in whole blood

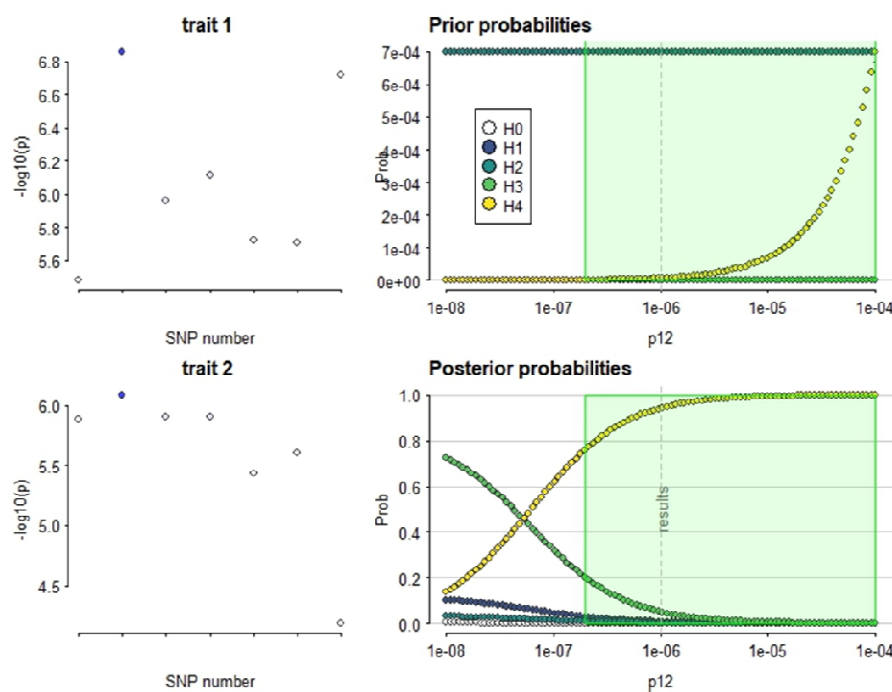

1070

## LY75 in lung

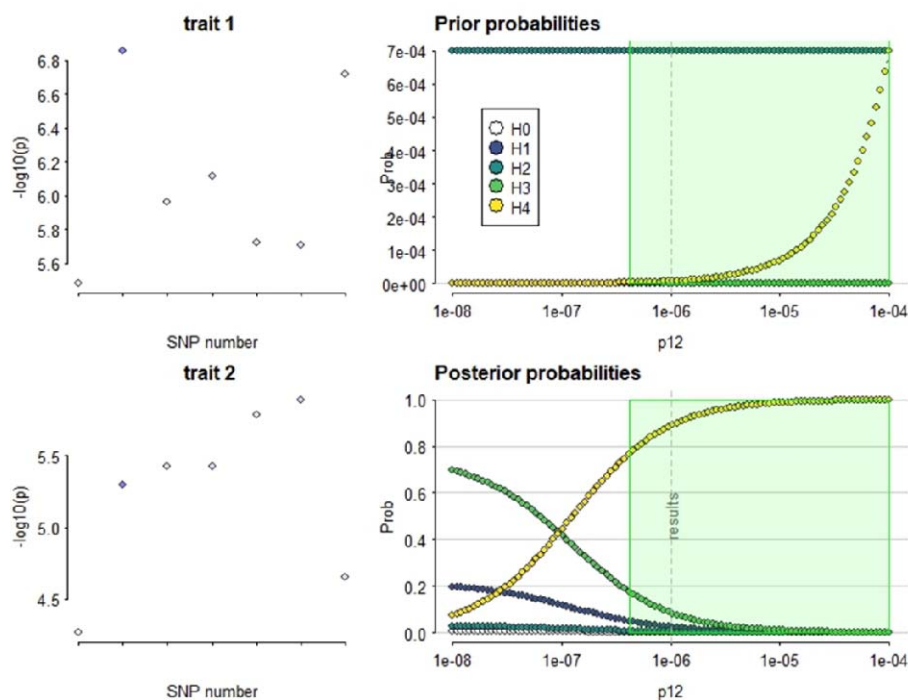

1071

## BAZZ2B in whole blood

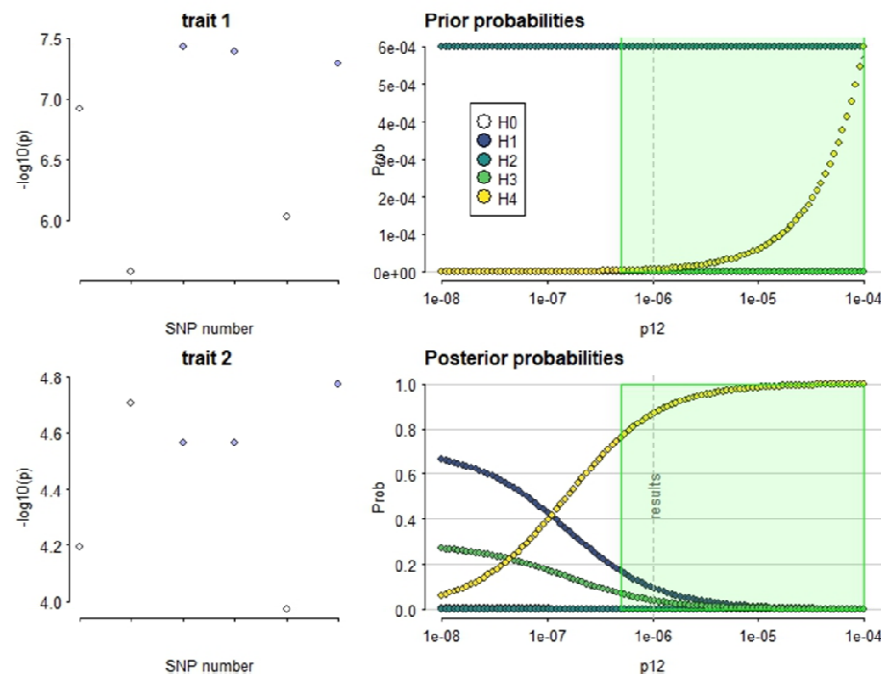

1072

## LY75 in esophagus mucosa

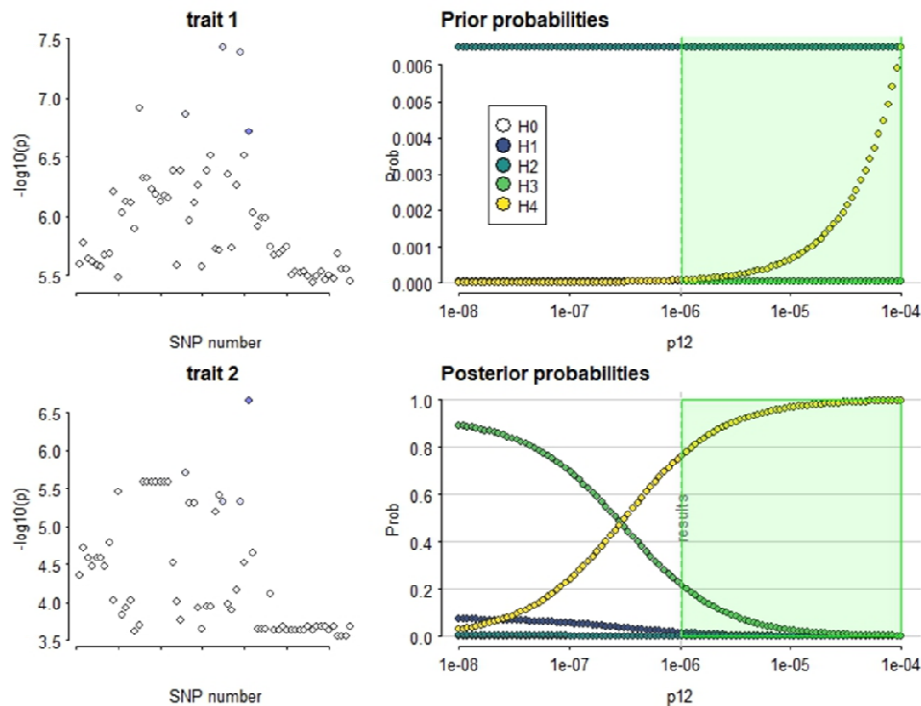

1073

1074

1075 **Supplementary Figure 5. Sensitivity plots from COLOC with whole blood**  
1076 **expression data from the GALA and SAGE II studies in AMR individuals.** *AFRhp5*  
1077 corresponds to the expression dataset computed in individuals with high African  
1078 ancestries; *AMRhp5* corresponds to the expression dataset computed individuals with  
1079 high AMR ancestries; *pooled* corresponds to the dataset computed with the total of  
1080 individuals from the study. In the right, the plots show in green the range of  $p_{12}$  values  
1081 (probability that a SNP is associated with both traits) for which the rule  $H_4 > 0.7$  is  
1082 supported. Plots in the left represent the variants included in the risk region common to  
1083 both traits along their individual association  $-\log_{10}(p\text{-values})$  for each trait, whereas the  
1084 shading shows the posterior probability that the SNP is causal given  $H_4$  is true. Trait 1  
1085 corresponds to COVID-19 hospitalization, while trait 2 corresponds to gene expression.

### CD302 In whole blood AFRhp5

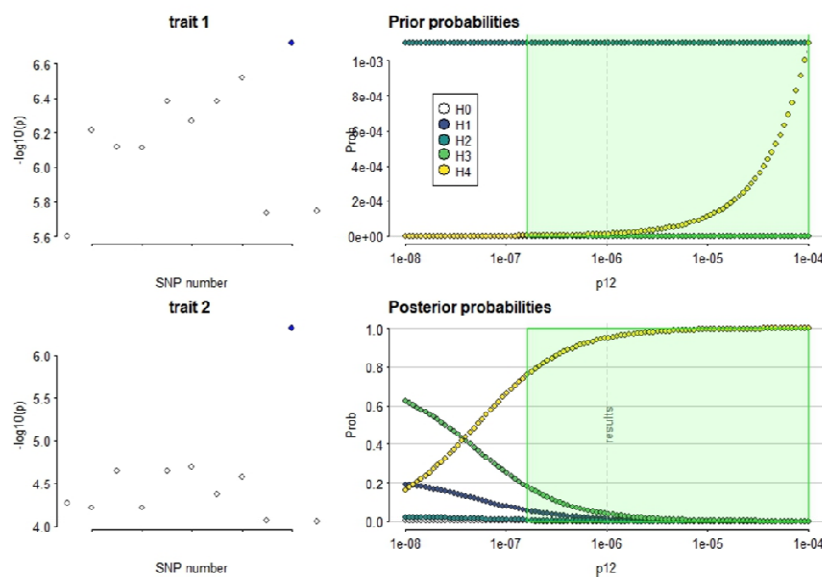

1086

### BAZ2B in whole blood AFRhp5

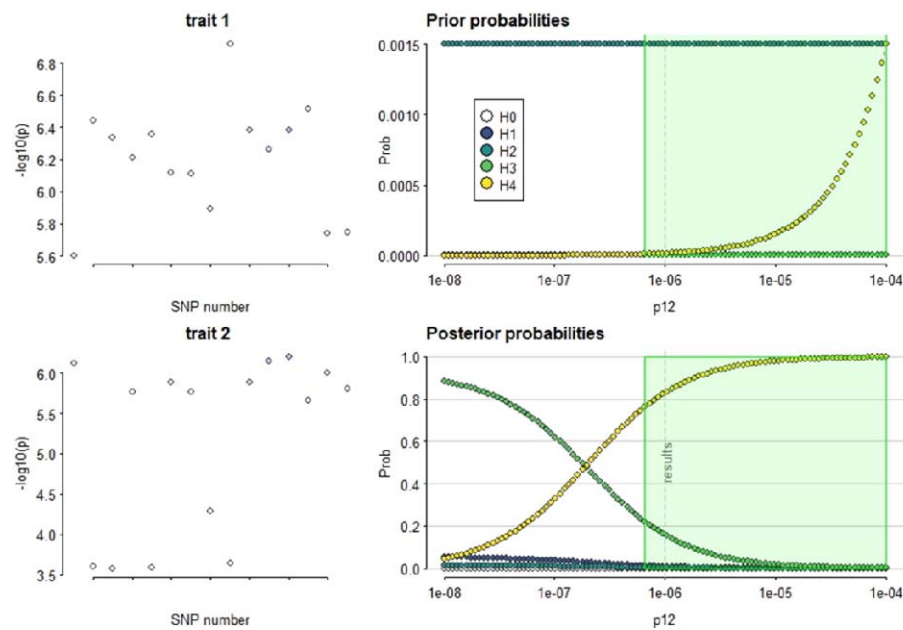

1087



### WDSUB1 in whole blood AFRhp5

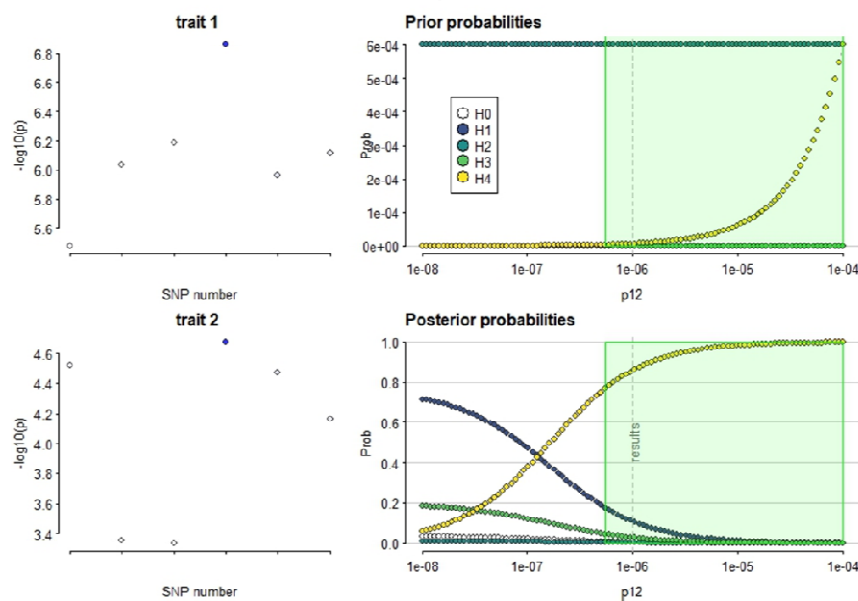

1088

### LY75 In whole blood AFRhp5

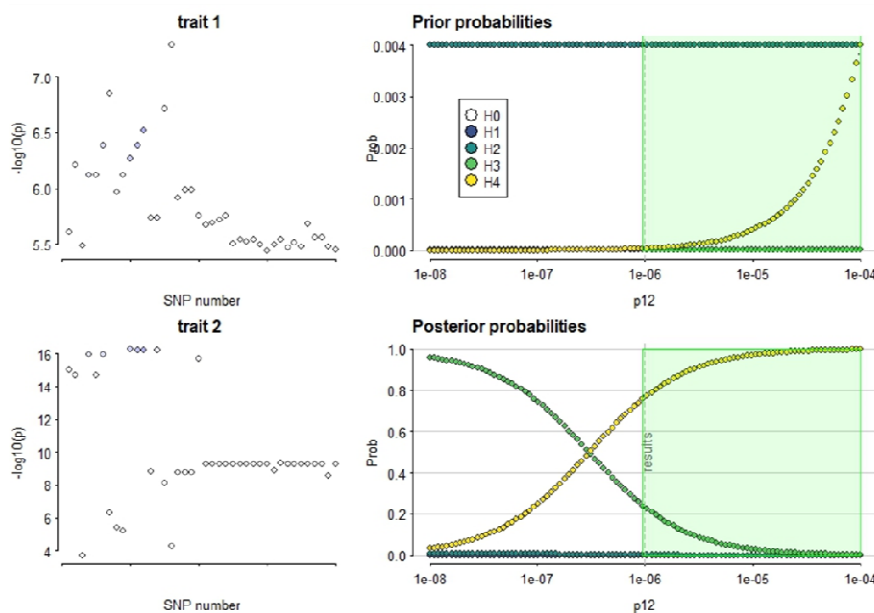

1089

## LY75 in whole blood AMRhp5

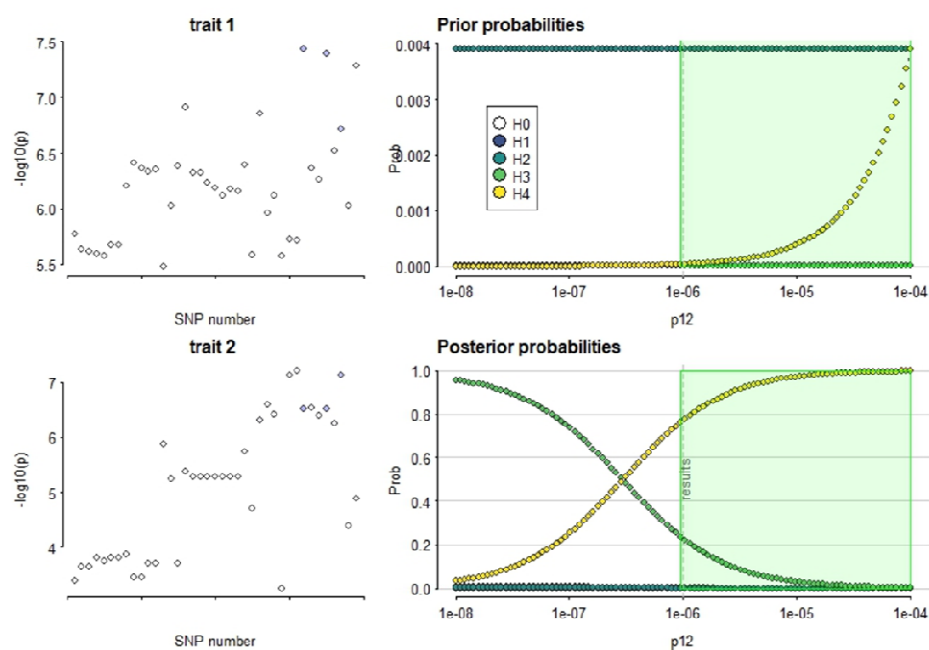

1090

## LY75 in whole blood pooled

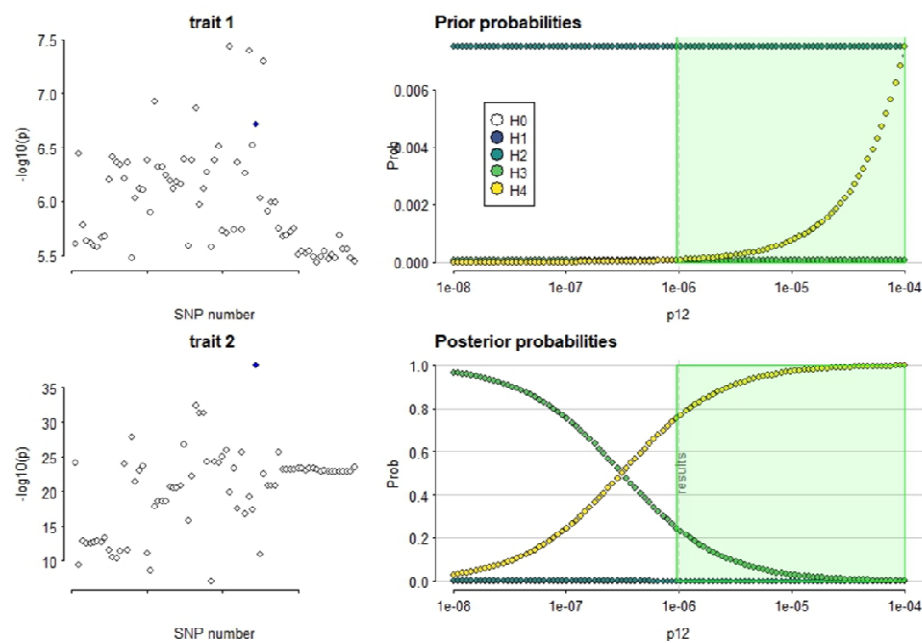

1091

## CD302 in whole blood pooled

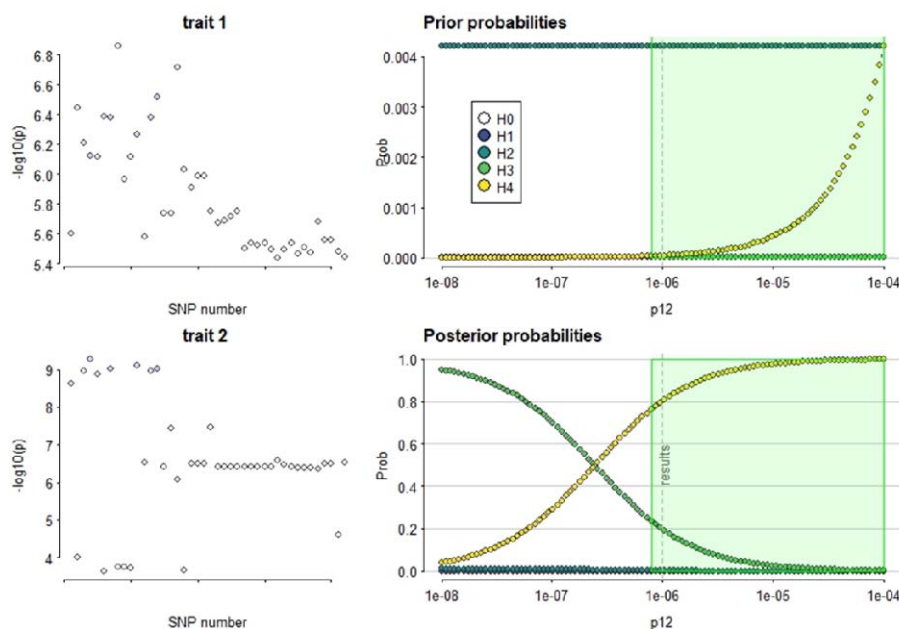

1092

1093

1094

1095 **Supplementary Figure 6. Gene-tissue pairs for which either rs1003835 or**  
1096 **rs60606421 are significant eQTLs at FDR<0.05 (data retrieved from**  
1097 **<https://gtexportal.org/home/snp/>). rs1003835 (chromosome 2) maps to *BAZ2B*, *LY75*,**  
1098 **and *PLA2R* genes. As for the lead variant of chromosome 11, rs77599934, since it was**  
1099 **not an eQTL, we used an LD proxy variant (rs60606421). *DDIAS* and *PRCP* genes map**  
1100 **closely to this variant. NES and p-values correspond to the normalized effect size (and**  
1101 **direction) of eQTL-gene associations and the p-value for the tissue, respectively.**

1102

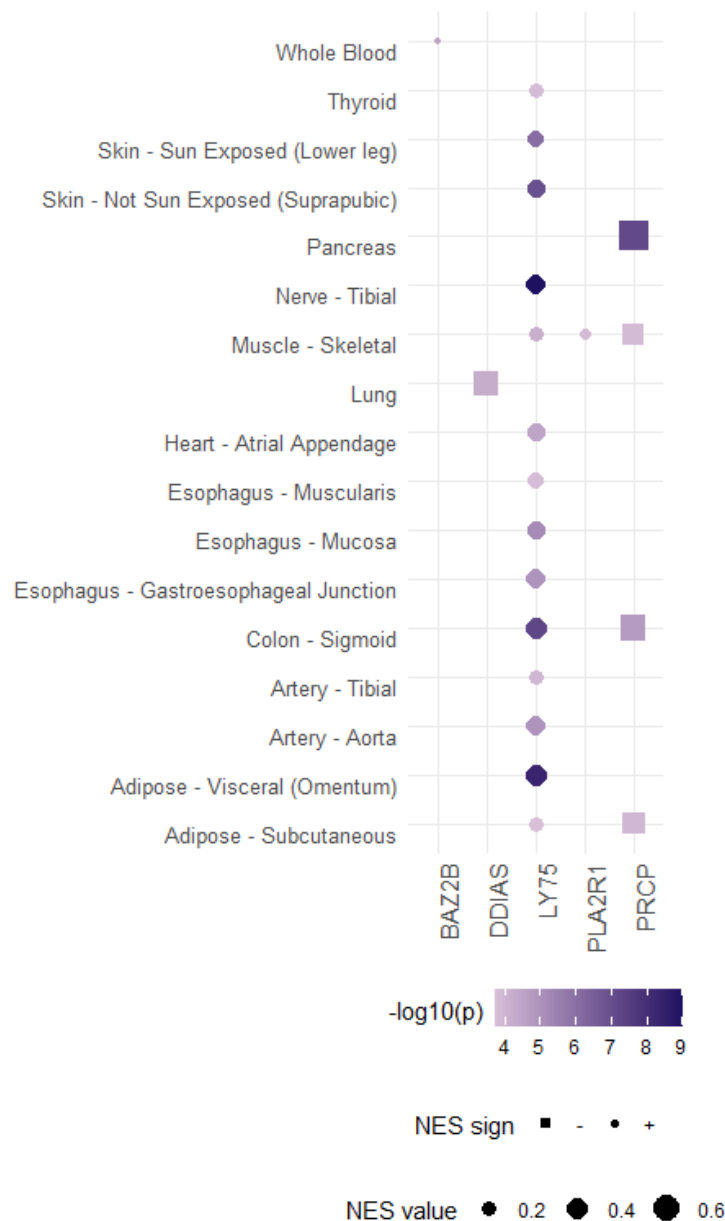

1103

1104

1105 **Scourge Cohort Group**

1106 Full list of cohort members and affiliations

1107 Javier Abellan<sup>1,2</sup>; René Acosta-Isaac<sup>3</sup>; Jose María Aguado<sup>4,5,6,7</sup>; Carlos Aguilar<sup>8</sup>; Sergio  
 1108 Aguilera-Albesa<sup>9,10</sup>; Abdolah Ahmadi Sabbagh<sup>11</sup>; Jorge Alba<sup>12</sup>; Sergiu Albu<sup>13,14,15</sup>;  
 1109 Karla A.M. Alcalá-Gallardo<sup>16</sup>; Julia Alcoba-Florez<sup>17</sup>; Sergio Alcolea Batres<sup>18</sup>; Holmes  
 1110 Rafael Algarin-Lara<sup>19,20</sup>; Virginia Almadana<sup>21</sup>; Julia Almeida<sup>22,23,24,25</sup>; Berta  
 1111 Almoguera<sup>26,27</sup>; María R. Alonso<sup>28</sup>; Nuria Alvarez<sup>28</sup>; Rodolfo Alvarez-Sala Walther<sup>18</sup>;  
 1112 Mónica T. Andrade<sup>29,30</sup>; Álvaro Andreu-Bernabeu<sup>31,6</sup>; Maria Rosa Antonijoan<sup>32</sup>; Eunat

1113 Arana-Arri<sup>33,34</sup>; Carlos Aranda<sup>35,36</sup>; Celso Arango<sup>31,37,6</sup>; Carolina Araque<sup>38,39</sup>; Nathalia  
1114 K. Araujo<sup>40</sup>; Izabel M.T. Araujo<sup>41</sup>; Ana C. Arcanjo<sup>42,43,44</sup>; Ana Arnaiz<sup>45,46,47</sup>; Francisco  
1115 Arnalich Fernández<sup>48</sup>; María J. Arranz<sup>49</sup>; José Ramon Arribas Lopez<sup>48</sup>; Maria-Jesus  
1116 Artiga<sup>50</sup>; Yubelly Avello-Malaver<sup>51</sup>; Carmen Ayuso<sup>26,27</sup>; Ana Margarita Baldión<sup>51</sup>;  
1117 Belén Ballina Martín<sup>11</sup>; Raúl C. Baptista-Rosas<sup>52,53,54</sup>; Andrea Barranco-Díaz<sup>20</sup>; María  
1118 Barreda- Sánchez<sup>55,56</sup>; Viviana Barrera-Penagos<sup>51</sup>; Moncef Belhassen-García<sup>57,58</sup>;  
1119 Enrique Bernal<sup>55</sup>; David Bernal-Bello<sup>59</sup>; Joao F. Bezerra<sup>60</sup>; Marcos A.C. Bezerra<sup>61</sup>;  
1120 Natalia Blanca-López<sup>62</sup>; Rafael Blancas<sup>63</sup>; Lucía Boix-Palop<sup>64</sup>; Alberto Borobia<sup>65</sup>; Elsa  
1121 Bravo<sup>66</sup>; María Brion<sup>67,68</sup>; Óscar Brochado-Kith<sup>69,7</sup>; Ramón Brugada<sup>70,71,68,72</sup>; Matilde  
1122 Bustos<sup>73</sup>; Alfonso Cabello<sup>74</sup>; Juan J. Caceres-Agra<sup>75</sup>; Esther Calbo<sup>76</sup>; Enrique J.  
1123 Calderón<sup>77,78,79</sup>; Shirley Camacho<sup>80</sup>; Cristina Carbonell<sup>81,58</sup>; Servando Cardona-  
1124 Huerta<sup>82</sup>; Antonio Augusto F. Carioca<sup>83</sup>; Maria Sanchez Carpintero<sup>35,36</sup>; Carlos Carpio  
1125 Segura<sup>18</sup>; Thássia M.T. Carratto<sup>84</sup>; José Antonio Carrillo-Avila<sup>85</sup>; Maria C.C.  
1126 Carvalho<sup>86</sup>; Carlos Casasnovas<sup>87,88,27</sup>; Luis Castano<sup>33,34,27,89,90</sup>; Carlos F. Castaño<sup>35,36</sup>;  
1127 Jose E. Castelao<sup>91</sup>; Aranzazu Castellano Candalija<sup>92</sup>; María A. Castillo<sup>80</sup>; Yolanda  
1128 Cañadas<sup>36</sup>; Francisco C. Ceballos<sup>27</sup>; Jessica G. Chaux<sup>39</sup>; Walter G. Chaves-  
1129 Santiago<sup>93,39</sup>; Sylena Chiquillo-Gómez<sup>19,20</sup>; Marco A. Cid-Lopez<sup>16</sup>; Oscar Cienfuegos-  
1130 Jimenez<sup>82</sup>; Rosa Conde-Vicente<sup>94</sup>; M. Lourdes Cordero-Lorenzana<sup>95</sup>; Dolores  
1131 Corella<sup>96,97</sup>; Almudena Corrales<sup>98,99</sup>; Jose L. Cortes-Sanchez<sup>82,100</sup>; Marta Corton<sup>26,27</sup>;  
1132 Tatiana X. Costa<sup>101</sup>; Raquel Cruz<sup>27,102</sup>; Marina S. Cruz<sup>40</sup>; Luisa Cuesta<sup>103</sup>; Gabriela C.R.  
1133 Cunha<sup>104</sup>; David Dalmau<sup>105,76</sup>; Raquel C.S. Dantas-Komatsu<sup>40</sup>; M. Teresa Darnaude<sup>106</sup>;  
1134 Alba De Martino-Rodríguez<sup>107,108</sup>; Juan De la Cruz Troca<sup>109,110,78</sup>; Juan Delgado-  
1135 Cuesta<sup>111</sup>; Aranzazu Diaz de Bustamante<sup>106</sup>; Covadonga M. Diaz-Caneja<sup>31,37,6</sup>; Beatriz  
1136 Dietl<sup>76</sup>; Silvia Diz-de Almeida<sup>27,102</sup>; Elena Domínguez-Garrido<sup>112</sup>; Alice M. Duarte<sup>41</sup>;  
1137 Anderson Díaz-Pérez<sup>20</sup>; Jose Echave-Sustaeta<sup>113</sup>; Rocío Eiros<sup>114</sup>; César O. Enciso-  
1138 Olivera<sup>38,39</sup>; Gabriela Escudero<sup>115</sup>; Pedro Pablo España<sup>116</sup>; Gladys Mercedes Estigarribia  
1139 Sanabria<sup>117</sup>; María Carmen Fariñas<sup>45,46,47</sup>; Marianne R. Fernandes<sup>118,119</sup>; Lidia  
1140 Fernandez-Caballero<sup>26,27</sup>; María J. Fernandez-Nestosa<sup>120</sup>; Ramón Fernández<sup>45,121</sup>; Silvia  
1141 Fernández Ferrero<sup>11</sup>; Yolanda Fernández Martínez<sup>11</sup>; Ana Fernández-Cruz<sup>122</sup>; Uxía  
1142 Fernández-Robelo<sup>123</sup>; Amanda Fernández-Rodríguez<sup>69,7</sup>; Marta Fernández-  
1143 Sampetro<sup>45,47,46</sup>; Ruth Fernández-Sánchez<sup>26,27</sup>; Tania Fernández-Villa<sup>124,78</sup>; Carmen  
1144 Fernández Capitán<sup>92</sup>; Patricia Flores-Pérez<sup>125</sup>; Vicente Friaiza<sup>78,79</sup>; Lácides Fuenmayor-  
1145 Hernández<sup>20</sup>; Marta Fuertes Núñez<sup>11</sup>; Victoria Fumadó<sup>126</sup>; Ignacio Gadea<sup>127</sup>; Lidia  
1146 Gagliardi<sup>35,36</sup>; Manuela Gago-Domínguez<sup>128,129</sup>; Natalia Gallego<sup>130</sup>; Cristina Galoppo<sup>131</sup>;  
1147 Carlos Garcia-Cerrada<sup>1,2,132</sup>; Josefina Garcia-García<sup>55</sup>; Inés García<sup>26,27</sup>; Mercedes  
1148 García<sup>35,36</sup>; Leticia García<sup>35,36</sup>; María Carmen García Torrejón<sup>133,2</sup>; Irene García-  
1149 García<sup>65</sup>; Carmen García-Ibarbia<sup>45,47,46</sup>; Andrés C. García-Montero<sup>134</sup>; Ana García-  
1150 Soidán<sup>135</sup>; Elisa García-Vázquez<sup>55</sup>; Aitor García-de-Vicuña<sup>33,136</sup>; Emiliano Garza-  
1151 Frias<sup>82</sup>; Jesus Gaytán-Martínez<sup>137</sup>; Angela Gentile<sup>131</sup>; Belén Gil-Fournier<sup>138</sup>; Fernan  
1152 Gonzalez Bernaldo de Quirós<sup>139</sup>; Manuel Gonzalez-Sagrado<sup>94</sup>; Hugo Gonzalo Benito<sup>140</sup>;  
1153 Beatriz González Álvarez<sup>107,108</sup>; Anna González-Neira<sup>28</sup>; Javier González-Peñas<sup>31,6,37</sup>;  
1154 Oscar Gorgojo-Galindo<sup>141</sup>; Florencia Guaragna<sup>131</sup>; Genilson P. Guegel<sup>142</sup>; Beatriz  
1155 Guillen-Guio<sup>98</sup>; Encarna Guillen-Navarro<sup>55,143,144,27</sup>; Pablo Guisado-Vasco<sup>113</sup>; Luz D.  
1156 Gutierrez-Castañeda<sup>145,39</sup>; Juan F. Gutiérrez-Bautista<sup>146</sup>; Luis Gómez Carrera<sup>18</sup>; María

1157 Gómez García<sup>128</sup>; Ángela Gómez Sacristán<sup>147</sup>; Javier Gómez-Arrue<sup>107,108</sup>; Mario  
1158 Gómez-Duque<sup>93,39</sup>; Miguel Górgolas<sup>74</sup>; Sarah Heili-Frades<sup>148</sup>; Estefania Hernandez<sup>149</sup>;  
1159 Luis D. Hernandez-Ortega<sup>150,151</sup>; Cristina Hernández Moro<sup>11</sup>; Guillermo Hernández-  
1160 Pérez<sup>81</sup>; Rebeca Hernández-Vaquero<sup>152</sup>; Belen Herraez<sup>28</sup>; M. Teresa Herranz<sup>55</sup>; María  
1161 Herrera<sup>35,36</sup>; María José Herrero<sup>153,154</sup>; Antonio Herrero-Gonzalez<sup>155</sup>; Juan P.  
1162 Horcajada<sup>156,157,14,158,7</sup>; Natale Imaz-Ayo<sup>33</sup>; Mainer Intxausti-Urrutibeaskoa<sup>159</sup>; Rafael H.  
1163 Jacomo<sup>160</sup>; Rubén Jara<sup>55</sup>; Perez Maria Jazmin<sup>131</sup>; María A. Jimenez-Sousa<sup>69,7</sup>; Ángel  
1164 Jiménez<sup>35,36</sup>; Pilar Jiménez<sup>146</sup>; Ignacio Jiménez-Alfaro<sup>161</sup>; Iolanda Jordan<sup>162,163,78</sup>; Rocío  
1165 Laguna-Goya<sup>164,165</sup>; Daniel Laorden<sup>18</sup>; María Lasa-Lazaro<sup>164,165</sup>; María Claudia  
1166 Lattig<sup>80,166</sup>; Ailen Lauriente<sup>131</sup>; Anabel Liger Borja<sup>167</sup>; Lucía Llanos<sup>169</sup>; Esther Lopez-  
1167 Garcia<sup>109,110,78,170</sup>; Rosario Lopez-Rodriguez<sup>26,27</sup>; Leonardo Lorente<sup>171</sup>; José E.  
1168 Lozano<sup>172</sup>; María Lozano-Espinosa<sup>167</sup>; Andre D. Luchessi<sup>173</sup>; Eduardo López  
1169 Granados<sup>174,175,27</sup>; Amparo López-Bernús<sup>81,58</sup>; Miguel A. López-Ruz<sup>176,177,178</sup>; Aluísio X.  
1170 Magalhães-Brasil<sup>179</sup>; Ignacio Mahillo<sup>180,181,99</sup>; Esther Mancebo<sup>164,165</sup>; Carmen Mar<sup>116</sup>;  
1171 Cristina Marcelo Calvo<sup>92</sup>; Miguel Marcos<sup>81,58</sup>; Alba Marcos-Delgado<sup>124</sup>; Pablo Mariscal  
1172 Aguilar<sup>18</sup>; Marta Martin-Fernandez<sup>182</sup>; Laura Martin-Pedraza<sup>62</sup>; Amalia Martinez<sup>183</sup>;  
1173 Iciar Martinez-Lopez<sup>184,185</sup>; Oscar Martinez-Nieto<sup>51,166</sup>; Pedro Martinez-Paz<sup>140</sup>; Angel  
1174 Martinez-Perez<sup>186</sup>; Michel F. Martinez-Resendez<sup>82</sup>; María M. Martín<sup>187</sup>; María Dolores  
1175 Martín<sup>188</sup>; Vicente Martín<sup>124,78</sup>; Caridad Martín-López<sup>167</sup>; José-Ángel Martín-  
1176 Oterino<sup>81,58</sup>; María Martín-Vicente<sup>69</sup>; Ricardo Martínez<sup>149</sup>; Juan José Martínez<sup>88,27</sup>;  
1177 Silvia Martínez<sup>45,47</sup>; Violeta Martínez Robles<sup>11</sup>; Eleno Martínez-Aquino<sup>189</sup>; Óscar  
1178 Martínez-González<sup>190</sup>; Andrea Martínez-Ramas<sup>26,27</sup>; Laura Marzal<sup>26,27</sup>; Alicia Marín  
1179 Candon<sup>65</sup>; Jose Antonio Mata-Marin,<sup>137</sup> Juliana F. Mazzeu<sup>179,191,192</sup>; Jeane F.P.  
1180 Medeiros<sup>40</sup>; Francisco J. Medrano<sup>77,78,79</sup>; Xose M. Meijome<sup>193,194</sup>; Natalia Mejuto-  
1181 Montero<sup>195</sup>; Celso T. Mendes-Junior<sup>84,196,197</sup>; Humberto Mendoza Charris<sup>66,20</sup>; Eleuterio  
1182 Merayo Macías<sup>198</sup>; Fátima Mercadillo<sup>199</sup>; Arie R. Mercado-Sesma<sup>150,151</sup>; Pablo  
1183 Minguez<sup>26,27</sup>; Antonio J J. Molina<sup>124,78</sup>; Elena Molina-Roldán<sup>200</sup>; Juan José Montoya<sup>149</sup>;  
1184 Patricia Moreira-Escriche<sup>201</sup>; Xenia Morelos-Arnedo<sup>66,20</sup>; Victor Moreno Cuerda<sup>1,2</sup>;  
1185 Alberto Moreno Fernández<sup>92</sup>; Antonio Moreno-Docón<sup>55</sup>; Junior Moreno-Escalante<sup>20</sup>;  
1186 Rubén Morilla<sup>79,202</sup>; Patricia Muñoz García<sup>203,99,6</sup>; Ana Méndez-Echevarria<sup>204</sup>; Pablo  
1187 Neira<sup>131</sup>; Julian Nevado<sup>27,131,205</sup>; Israel Nieto-Gañán<sup>135</sup>; Joana F.R. Nunes<sup>42</sup>; Rocio  
1188 Nuñez- Torres<sup>28</sup>; Antònia Obrador-Hevia<sup>206,207</sup>; J. Gonzalo Ocejo-Vinyals<sup>45,47</sup>; Virginia  
1189 Olivar<sup>131</sup>; Silviene F. Oliveira<sup>179,208,208,210,211</sup>; Lorena Ondo<sup>26,27</sup>; Alberto Orfao<sup>22,23,24,25</sup>;  
1190 Luis Ortega<sup>212</sup>; Eva Ortega-Paino<sup>50</sup>; Fernando Ortiz-Flores<sup>45,47</sup>; Rocio Ortiz-Lopez<sup>213,82</sup>;  
1191 José A. Oteo<sup>12,214</sup>; Harry Pachajoa<sup>215,216</sup>; Manuel Pacheco<sup>149</sup>; Fredy Javier Pacheco-  
1192 Miranda<sup>20</sup>; Irene Padilla Conejo<sup>11</sup>; Sonia Panadero-Fajardo<sup>85</sup>; Mara Parellada<sup>31,37,6</sup>;  
1193 Roberto Pariente-Rodríguez<sup>131</sup>; Estela Paz-Artal<sup>164,165,217</sup>; Germán Peces-Barba<sup>218,99</sup>;  
1194 Miguel S. Pedromingo Kus<sup>219</sup>; Celia Perales<sup>127</sup>; Patricia Perez<sup>220</sup>; Gustavo Perez-de-  
1195 Nanclares<sup>33,221</sup>; Teresa Perucho<sup>222</sup>; Aline Pic-Taylor<sup>42,208,209,211</sup>; Lisbeth A. Pichardo<sup>11</sup>;  
1196 Mel-lina Pinsach-Abuin<sup>70,68</sup>; Luz Adriana Pinzón<sup>93,39</sup>; Guillermo Pita<sup>30</sup>; Francesc Pla-  
1197 Junca<sup>223,27</sup>; Laura Planas-Serra<sup>88,27</sup>; Ericka N. Pompa-Mera<sup>224,137</sup>; Gloria L. Porras-  
1198 Hurtado<sup>149</sup>; Aurora Pujol<sup>88,27,225</sup>; César Pérez<sup>226</sup>; Felipe Pérez-García<sup>227,228</sup>; Patricia  
1199 Pérez-Matute<sup>214</sup>; Alexandra Pérez-Serra<sup>70,68</sup>; M. Elena Pérez-Tomás<sup>55</sup>; María Eugenia  
1200 Quevedo Chávez<sup>19,20</sup>; Maria Angeles Quijada<sup>30,229</sup>; Inés Quintela<sup>128</sup>; Diana Ramirez-

1201 Montaña<sup>230</sup>; Soraya Ramiro León<sup>131</sup>; Pedro Rascado Sedes<sup>231</sup>; Delia Recalde<sup>107,108</sup>;  
1202 Emma Recio-Fernández<sup>214</sup>; Salvador Resino<sup>69,7</sup>; Adriana P. Ribeiro<sup>29,30,232</sup>; Carlos S.  
1203 Rivadeneira-Chamorro<sup>39</sup>; Diana Roa-Agudelo<sup>51</sup>; Montserrat Robelo Pardo<sup>231</sup>; Marilyn  
1204 Johanna Rodriguez<sup>39</sup>; German Ezequiel Rodriguez Novoa<sup>131</sup>; Fernando Rodriguez-  
1205 Artalejo<sup>109,110,78,170</sup>; Carlos Rodriguez-Gallego<sup>233,234</sup>; José A. Rodriguez-Garcia<sup>11</sup>; María  
1206 A. Rodriguez-Hernandez<sup>73</sup>; Antonio Rodriguez-Nicolas<sup>146</sup>; Agustí Rodriguez-  
1207 Palmero<sup>235,88</sup>; Paula A. Rodriguez-Urrego<sup>51</sup>; Belén Rodríguez Maya<sup>1</sup>; Marena  
1208 Rodríguez-Ferrer<sup>20</sup>; Emilio Rodríguez-Ruiz<sup>231,129</sup>; Federico Rojo<sup>236,25</sup>; Andrea Romero-  
1209 Coronado<sup>20</sup>; Filomeno Rondón García<sup>11</sup>; Lidia S. Rosa<sup>236</sup>; Antonio Rosales-Castillo<sup>237</sup>;  
1210 Cladelis Rubio<sup>238,239</sup>; María Rubio Olivera<sup>35,36</sup>; Montserrat Ruiz<sup>88,27</sup>; Francisco Ruiz-  
1211 Cabello<sup>146,177,240</sup>; Eva Ruiz-Casares<sup>222</sup>; Juan J. Ruiz-Cubillan<sup>45,47</sup>; Javier Ruiz-  
1212 Hornillos<sup>241,36,242</sup>; Pablo Ryan<sup>243,244,245,7</sup>; Hector D. Salamanca<sup>38,39</sup>; Lorena Salazar-  
1213 García<sup>80</sup>; Giorgina Gabriela Salgueiro Origlia<sup>92</sup>; Cristina Sancho-Sainz<sup>159</sup>; Jorge Luis  
1214 Sandoval-Ramírez,<sup>137</sup> Anna Sangil<sup>64</sup>; Arnoldo Santos<sup>226</sup>; Ney P.C. Santos<sup>118</sup>; Amanda  
1215 C.M. Saúde<sup>30,246</sup> Agatha Schlüter<sup>88,27</sup>; Sonia Segovia<sup>223,247,248</sup>; Alex Serra-Llovich<sup>249</sup>;  
1216 Fernando Sevil Puras<sup>8</sup>; Marta Sevilla Porras<sup>27,130</sup>; Miguel A. Siculo<sup>250,251</sup>; Vivian N.  
1217 Silbiger<sup>173</sup>; Nayara S. Silva<sup>252</sup>; Fabiola T.C. Silva<sup>40</sup>; Cristina Silván Fuentes<sup>27</sup>; Jordi  
1218 Solé-Violán<sup>253,99,254</sup>; José Manuel Soria<sup>186</sup>; Jose V. Sorli<sup>96,97</sup>; Renata R. Sousa<sup>179</sup>; Juan  
1219 Carlos Souto<sup>3</sup>; Karla S.C. Souza<sup>86</sup>; Vanessa S. Souza<sup>104</sup>; John J. Sprockel<sup>93,39</sup>; David A.  
1220 Suarez-Zamora<sup>51</sup>; José Javier Suárez-Rama<sup>128</sup>; Pedro-Luis Sánchez<sup>114,58</sup>; Antonio J.  
1221 Sánchez López<sup>255</sup>; María Concepción Sánchez Prados<sup>18</sup>; Javier Sánchez Real<sup>11</sup>; Jorge  
1222 Sánchez Redondo<sup>1,256</sup>; Clara Sánchez-Pablo<sup>114</sup>; Olga Sánchez-Pernaute<sup>257</sup>; Xiana  
1223 Taboada-Fraga<sup>195</sup>; Eduardo Tamayo<sup>258,140,7</sup>; Alvaro Tamayo-Velasco<sup>259</sup>; Juan Carlos  
1224 Taracido-Fernandez<sup>155</sup>; Nathali A.C. Tavares<sup>260</sup>; Carlos Tellería<sup>107,108</sup>; Jair Antonio  
1225 Tenorio Castaño<sup>27,130,205</sup>; Alejandro Teper<sup>131</sup>; Ronald P. Torres Gutiérrez<sup>221</sup>; Juan  
1226 Torres-Macho<sup>261</sup>; Lilian Torres-Tobar<sup>39</sup>; Jesús Troya<sup>243</sup>; Miguel Urioste<sup>199</sup>; Juan  
1227 Valencia-Ramos<sup>262</sup>; Agustín Valido<sup>21,263</sup>; Juan Pablo Vargas Gallo<sup>264,265</sup>; Belén  
1228 Varón<sup>266</sup>; Romero H.T. Vasconcelos<sup>260</sup>; Tomas Vega<sup>267</sup>; Santiago Velasco-Quirce<sup>268</sup>;  
1229 Julia Vidán Estévez<sup>11</sup>; Miriam Vieitez-Santiago<sup>45,47</sup>; Carlos Vilches<sup>269</sup>; Lavinia  
1230 Villalobos<sup>11</sup>; Felipe Villar<sup>218</sup>; Judit Villar-García<sup>270,271,272</sup>; Cristina Villaverde<sup>26,27</sup>; Pablo  
1231 Villoslada-Blanco<sup>214</sup>; Ana Virseda-Berdices<sup>69</sup>; Valentina Vélez-Santamaría<sup>87,88</sup>;  
1232 Virginia Víctor<sup>35,36</sup>; Zuleima Yáñez<sup>20</sup>; Antonio Zapatero-Gaviria<sup>273</sup>; Ruth Zarate<sup>274</sup>;  
1233 Sandra Zazo<sup>236</sup>; Gabriela V. da Silva<sup>41</sup>; Raimundo de Andrés<sup>275</sup>; Jéssica N.G. de  
1234 Araújo<sup>252</sup>; Carmen de Juan<sup>201</sup>; Julianna Lys de Sousa Alves Neri<sup>276</sup>; Carmen de la  
1235 Horra<sup>79</sup>; Ana B. de la Hoz<sup>33</sup>; Victor del Campo-Pérez<sup>277</sup>; Manoella do Monte  
1236 Alves<sup>278,279</sup>; Katusse A. dos Santos<sup>86</sup>; Yady Álvarez-Benítez<sup>19,20</sup>; Felipe Álvarez-  
1237 Navia<sup>81,58</sup>; María Íñiguez<sup>214</sup>; Miguel López de Heredia<sup>27</sup>; Ingrid Mendes<sup>27</sup>; Rocío  
1238 Moreno<sup>27</sup>; Esther Sande<sup>27,129,102</sup>; Carlos Flores<sup>280,98,99,234</sup>; José A. Riancho<sup>45,46,47,27</sup>;  
1239 Augusto Rojas-Martinez<sup>82</sup>; Pablo Lapunzina<sup>27,130,205</sup>; Angel Carracedo<sup>27,129,102,128</sup>

1240 Scourge Cohort Group's filiations

1241 <sup>1</sup>, Hospital Universitario Mostoles, Medicina Interna, Madrid, Spain

1242 <sup>2</sup>, Universidad Francisco de Vitoria, Madrid, Spain

- 1243 <sup>3</sup>, Haemostasis and Thrombosis Unit, Hospital de la Santa Creu i Sant Pau, IIB Sant Pau,  
1244 Barcelona, Spain
- 1245 <sup>4</sup>, Unit of Infectious Diseases, Hospital Universitario 12 de Octubre, Instituto de Investigación  
1246 Sanitaria Hospital 12 de Octubre (imas12), Madrid, Spain
- 1247 <sup>5</sup>, Spanish Network for Research in Infectious Diseases (REIPI RD16/0016/0002), Instituto de  
1248 Salud Carlos III, Madrid, Spain
- 1249 <sup>6</sup>, School of Medicine, Universidad Complutense, Madrid, Spain
- 1250 <sup>7</sup>, Centro de Investigación Biomédica en Red de Enfermedades Infecciosas (CIBERINFEC),  
1251 Instituto de Salud Carlos III, Madrid, Spain
- 1252 <sup>8</sup>, Hospital General Santa Bárbara de Soria, Soria, Spain
- 1253 <sup>9</sup>, Pediatric Neurology Unit, Department of Pediatrics, Navarra Health Service Hospital,  
1254 Pamplona, Spain
- 1255 <sup>10</sup>, Navarra Health Service, NavarraBioMed Research Group, Pamplona, Spain
- 1256 <sup>11</sup>, Complejo Asistencial Universitario de León, León, Spain
- 1257 <sup>12</sup>, Hospital Universitario San Pedro, Infectious Diseases Department, Logroño, Spain
- 1258 <sup>13</sup>, Fundació Institut Guttmann, Institut Universitari de Neurorehabilitació adscrit a la UAB,  
1259 Hospital de Neurorehabilitació, Barcelona, Spain
- 1260 <sup>14</sup>, Universitat Autònoma de Barcelona (UAB), Barcelona, Spain
- 1261 <sup>15</sup>, Fundació Institut d'Investigació en Ciències de la Salut Germans Trias i Pujol, Barcelona,  
1262 Spain
- 1263 <sup>16</sup>, Hospital General de Occidente, Guadalajara, Mexico
- 1264 <sup>17</sup>, Microbiology Unit, Hospital Universitario N. S. de Candelaria, Santa Cruz de Tenerife,  
1265 Spain
- 1266 <sup>18</sup>, Hospital Universitario La Paz-IDIPAZ, Servicio de Neumología, Madrid, Spain
- 1267 <sup>19</sup>, Camino Universitario Adelita de Char, Mired IPS, Barranquilla, Colombia
- 1268 <sup>20</sup>, Universidad Simón Bolívar, Facultad de Ciencias de la Salud, Barranquilla, Colombia
- 1269 <sup>21</sup>, Hospital Universitario Virgen Macarena, Neumología, Seville, Spain
- 1270 <sup>22</sup>, Departamento de Medicina, Universidad de Salamanca, Salamanca, Spain
- 1271 <sup>23</sup>, Centro de Investigación del Cáncer (IBMCC) Universidad de Salamanca - CSIC, Salamanca,  
1272 Spain
- 1273 <sup>24</sup>, Biomedical Research Institute of Salamanca (IBSAL) Salamanca, Spain
- 1274 <sup>25</sup>, Centre for Biomedical Network Research on Cancer (CIBERONC), Instituto de Salud Carlos  
1275 III, Madrid, Spain
- 1276 <sup>26</sup>, Department of Genetics & Genomics, Instituto de Investigación Sanitaria-Fundación Jiménez  
1277 Díaz University Hospital - Universidad Autónoma de Madrid (IIS-FJD, UAM), Madrid, Spain
- 1278 <sup>27</sup>, Centre for Biomedical Network Research on Rare Diseases (CIBERER), Instituto de Salud  
1279 Carlos III, Madrid, Spain
- 1280 <sup>28</sup>, Spanish National Cancer Research Centre, Human Genotyping-CEGEN Unit, Madrid, Spain
- 1281 <sup>29</sup>, Hospital das Forças Armadas, Brazil



- 1282 <sup>30</sup>, Exército Brasileiro, Brazil
- 1283 <sup>31</sup>, Department of Child and Adolescent Psychiatry, Institute of Psychiatry and Mental Health,  
1284 Hospital General Universitario Gregorio Marañón (IiSGM), Madrid, Spain
- 1285 <sup>32</sup>, Clinical Pharmacology Service, Hospital de la Santa Creu i Sant Pau, IIB Sant Pau,  
1286 Barcelona, Spain
- 1287 <sup>33</sup>, Biocruces Bizkai HRI, Barakaldo, Bizkaia, Spain
- 1288 <sup>34</sup>, Cruces University Hospital, Osakidetza, Barakaldo, Bizkaia, Spain
- 1289 <sup>35</sup>, Hospital Infanta Elena, Valdemoro, Madrid, Spain
- 1290 <sup>36</sup>, Instituto de Investigación Sanitaria-Fundación Jiménez Díaz University Hospital -  
1291 Universidad Autónoma de Madrid (IIS-FJD, UAM), Madrid, Spain
- 1292 <sup>37</sup>, Centre for Biomedical Network Research on Mental Health (CIBERSAM), Instituto de Salud  
1293 Carlos III, Madrid, Spain
- 1294 <sup>38</sup>, Fundación Hospital Infantil Universitario de San José, Bogotá, Colombia
- 1295 <sup>39</sup>, Fundación Universitaria de Ciencias de la Salud, Bogotá, Colombia
- 1296 <sup>40</sup>, Universidade Federal do Rio Grande do Norte, Programa de Pós-graduação em Ciências da  
1297 Saúde, Natal, Brazil
- 1298 <sup>41</sup>, Universidade Federal do Rio Grande do Norte, Departamento de Medicina Clínica, Natal,  
1299 Brazil
- 1300 <sup>42</sup>, Departamento de Genética e Morfologia, Instituto de Ciências Biológicas, Universidade de  
1301 Brasília, Brasilia, Brazil
- 1302 <sup>43</sup>, Colégio Marista de Brasília, Brazil
- 1303 <sup>44</sup>, Associação Brasileira de Educação e Cultura, Brazil
- 1304 <sup>45</sup>, IDIVAL, Santander, Spain
- 1305 <sup>46</sup>, Universidad de Cantabria, Santander, Spain
- 1306 <sup>47</sup>, Hospital U M Valdecilla, Santander, Spain
- 1307 <sup>48</sup>, Hospital Universitario La Paz-IDIPAZ, Servicio de Medicina Interna, Madrid, Spain
- 1308 <sup>49</sup>, Fundació Docència I Recerca Mutua Terrassa, Barcelona, Spain
- 1309 <sup>50</sup>, Spanish National Cancer Research Center, CNIO Biobank, Madrid, Spain
- 1310 <sup>51</sup>, Fundación Santa Fe de Bogota, Departamento Patología y Laboratorios, Bogotá, Colombia
- 1311 <sup>52</sup>, Hospital General de Occidente, Zapopan, Jalisco, Mexico
- 1312 <sup>53</sup>, Centro Universitario de Tonalá, Universidad de Guadalajara, Tonalá, Jalisco, Mexico
- 1313 <sup>54</sup>, Centro de Investigación Multidisciplinario en Salud, Universidad de Guadalajara, Tonalá,  
1314 Jalisco, Mexico
- 1315 <sup>55</sup>, Instituto Murciano de Investigación Biosanitaria (IMIB-Arrixaca), Murcia, Spain
- 1316 <sup>56</sup>, Universidad Católica San Antonio de Murcia (UCAM), Murcia, Spain
- 1317 <sup>57</sup>, Hospital Universitario de Salamanca-IBSAL, Servicio de Medicina Interna-Unidad de  
1318 Enfermedades Infecciosas, Salamanca, Spain
- 1319 <sup>58</sup>, Universidad de Salamanca, Salamanca, Spain

- 1320 <sup>59</sup>, Hospital Universitario de Fuenlabrada, Department of Internal Medicine, Madrid, Spain
- 1321 <sup>60</sup>, Escola Tecnica de Saúde, Laboratorio de Vigilancia Molecular Aplicada, Pará, Brazil
- 1322 <sup>61</sup>, Federal University of Pernambuco, Genetics Postgraduate Program, Recife, PE, Brazil
- 1323 <sup>62</sup>, Hospital Universitario Infanta Leonor, Servicio de Alergia, Madrid, Spain
- 1324 <sup>63</sup>, Hospital Universitario del Tajo, Servicio de Medicina Intensiva, Aranjuez, Spain
- 1325 <sup>64</sup>, Hospital Universitario Mutua Terrassa, Barcelona, Spain
- 1326 <sup>65</sup>, Hospital Universitario La Paz-IDIPAZ, Servicio de Farmacología, Madrid, Spain
- 1327 <sup>66</sup>, Alcaldía de Barranquilla, Secretaría de Salud, Barranquilla, Colombia
- 1328 <sup>67</sup>, Instituto de Investigación Sanitaria de Santiago (IDIS), Xenética Cardiovascular, Santiago de  
1329 Compostela, Spain
- 1330 <sup>68</sup>, Centre for Biomedical Network Research on Cardiovascular Diseases (CIBERCV), Instituto  
1331 de Salud Carlos III, Madrid, Spain
- 1332 <sup>69</sup>, Unidad de Infección Viral e Inmunidad, Centro Nacional de Microbiología (CNM), Instituto  
1333 de Salud Carlos III (ISCIII), Madrid, Spain
- 1334 <sup>70</sup>, Cardiovascular Genetics Center, Institut d'Investigació Biomèdica Girona (IDIBGI), Girona,  
1335 Spain
- 1336 <sup>71</sup>, Medical Science Department, School of Medicine, University of Girona, Girona, Spain
- 1337 <sup>72</sup>, Hospital Josep Trueta, Cardiology Service, Girona, Spain
- 1338 <sup>73</sup>, Institute of Biomedicine of Seville (IBiS), Consejo Superior de Investigaciones Científicas  
1339 (CSIC)- University of Seville- Virgen del Rocio University Hospital, Seville, Spain
- 1340 <sup>74</sup>, Division of Infectious Diseases, Instituto de Investigación Sanitaria-Fundación Jiménez Díaz  
1341 University Hospital - Universidad Autónoma de Madrid (IIS-FJD, UAM), Madrid, Spain
- 1342 <sup>75</sup>, Intensive Care Unit, Hospital Universitario Insular de Gran Canaria, Las Palmas de Gran  
1343 Canaria, Spain
- 1344 <sup>76</sup>, Hospital Universitario Mutua Terrassa, Terrassa, Spain
- 1345 <sup>77</sup>, Departamento de Medicina, Hospital Universitario Virgen del Rocío, Universidad de Sevilla,  
1346 Seville, Spain
- 1347 <sup>78</sup>, Centre for Biomedical Network Research on Epidemiology and Public Health (CIBERESP),  
1348 Instituto de Salud Carlos III, Madrid, Spain
- 1349 <sup>79</sup>, Institute of Biomedicine of Seville (IBiS), Consejo Superior de Investigaciones Científicas  
1350 (CSIC)- University of Seville- Virgen del Rocio University Hospital, Seville, Spain
- 1351 <sup>80</sup>, Universidad de los Andes, Facultad de Ciencias, Bogotá, Colombia
- 1352 <sup>81</sup>, Hospital Universitario de Salamanca-IBSAL, Servicio de Medicina Interna, Salamanca,  
1353 Spain
- 1354 <sup>82</sup>, Tecnológico de Monterrey, Escuela de Medicina y Ciencias de la Salud and Hospital San  
1355 Jose TecSalud, Monterrey, Mexico
- 1356 <sup>83</sup>, University of Fortaleza (UNIFOR), Department of Nutrition. Fortaleza, Brazil
- 1357 <sup>84</sup>, Departamento de Química, Faculdade de Filosofia, Ciências e Letras de Ribeirão Preto,  
1358 Universidade de São Paulo, Brazil

- 1359 <sup>85</sup>, Andalusian Public Health System Biobank, Granada, Spain
- 1360 <sup>86</sup>, Universidade Federal do Rio Grande do Norte, Programa de Pós-Graduação em Ciências  
1361 Farmacêuticas, Natal, Brazil
- 1362 <sup>87</sup>, Neuromuscular Unit, Neurology Department, Hospital Universitari de Bellvitge,  
1363 L'Hospitalet de Llobregat (Barcelona), Spain
- 1364 <sup>88</sup>, Bellvitge Biomedical Research Institute (IDIBELL), Neurometabolic Diseases Laboratory,  
1365 L'Hospitalet de Llobregat, Spain
- 1366 <sup>89</sup>, Centre for Biomedical Network Research on Diabetes and Metabolic Associated Diseases  
1367 (CIBERDEM), Instituto de Salud Carlos III, Madrid, Spain
- 1368 <sup>90</sup>, University of Pais Vasco, UPV/EHU, Bizkaia, Spain
- 1369 <sup>91</sup>, Oncology and Genetics Unit, Instituto de Investigacion Sanitaria Galicia Sur, Xerencia de  
1370 Xestion Integrada de Vigo-Servizo Galego de Saúde, Vigo, Spain
- 1371 <sup>92</sup>, Hospital Universitario La Paz, Hospital Carlos III, Madrid, Spain
- 1372 <sup>93</sup>, Hospital de San José, Sociedad de Cirugía de Bogota, Bogotá, Colombia
- 1373 <sup>94</sup>, Hospital Universitario Río Hortega, Valladolid, Spain
- 1374 <sup>95</sup>, Servicio de Medicina intensiva, Complejo Hospitalario Universitario de A Coruña  
1375 (CHUAC), Sistema Galego de Saúde (SERGAS), A Coruña, Spain
- 1376 <sup>96</sup>, Valencia University, Preventive Medicine Department, Valencia, Spain
- 1377 <sup>97</sup>, Centre for Biomedical Network Research on Physiopatology of Obesity and Nutrition  
1378 (CIBEROBN), Instituto de Salud Carlos III, Madrid, Spain
- 1379 <sup>98</sup>, Research Unit, Hospital Universitario N.S. de Candelaria, Santa Cruz de Tenerife, Spain
- 1380 <sup>99</sup>, Centre for Biomedical Network Research on Respiratory Diseases (CIBERES), Instituto de  
1381 Salud Carlos III, Madrid, Spain
- 1382 <sup>100</sup>, Otto von Guericke University, Department of Microgravity and Translational Regenerative  
1383 Medicine, Magdeburg, Germany
- 1384 <sup>101</sup>, Maternidade Escola Janário Cicco, Natal, Brazil
- 1385 <sup>102</sup>, Centro Singular de Investigación en Medicina Molecular y Enfermedades Crónicas  
1386 (CIMUS), Universidade de Santiago de Compostela, Santiago de Compostela, Spain
- 1387 <sup>103</sup>, Institute of Psychiatry and Mental Health, Hospital General Universitario Gregorio Marañón  
1388 (IiSGM), Madrid, Spain
- 1389 <sup>104</sup>, Programa de Pós Graduação em Ciências da Saúde, Faculdade de Medicina, Universidade  
1390 de Brasília, Brasilia, Brazil
- 1391 <sup>105</sup>, Fundació Docència I Recerca Mutua Terrassa, Terrassa, Spain
- 1392 <sup>106</sup>, Hospital Universitario Mostoles, Unidad de Genética, Madrid, Spain
- 1393 <sup>107</sup>, Instituto Aragonés de Ciencias de la Salud (IACS), Zaragoza, Spain
- 1394 <sup>108</sup>, Instituto Investigación Sanitaria Aragón (IIS-Aragon), Zaragoza, Spain
- 1395 <sup>109</sup>, Department of Preventive Medicine and Public Health, School of Medicine, Universidad  
1396 Autónoma de Madrid, Madrid, Spain
- 1397 <sup>110</sup>, IdiPaz (Instituto de Investigación Sanitaria Hospital Universitario La Paz), Madrid, Spain

- 1398 <sup>111</sup>, Hospital Universitario Virgen del Rocío, Servicio de Medicina Interna, Seville, Spain
- 1399 <sup>112</sup>, Unidad Diagnóstico Molecular. Fundación Rioja Salud, La Rioja, Spain
- 1400 <sup>113</sup>, Hospital Universitario Quironsalud Madrid, Madrid, Spain
- 1401 <sup>114</sup>, Hospital Universitario de Salamanca-IBSAL, Servicio de Cardiología, Salamanca, Spain
- 1402 <sup>115</sup>, Hospital Universitario Puerta de Hierro, Servicio de Medicina Interna, Majadahonda, Spain
- 1403 <sup>116</sup>, Biocruces Bizkaia Health Research Institute, Galdakao University Hospital, Osakidetza,  
1404 Bizkaia, Spain
- 1405 <sup>117</sup>, Instituto Regional de Investigación en Salud-Universidad Nacional de Caaguazú, Caaguazú,  
1406 Paraguay
- 1407 <sup>118</sup>, Universidade Federal do Pará, Núcleo de Pesquisas em Oncologia, Belém, Pará, Brazil
- 1408 <sup>119</sup>, Hospital Ophir Loyola, Departamento de Ensino e Pesquisa, Belém, Pará, Brazil
- 1409 <sup>120</sup>, Universidad Nacional de Asunción, Facultad de Politécnica, Paraguay
- 1410 <sup>121</sup>, Fundación Asilo San Jose, Santander, Spain
- 1411 <sup>122</sup>, Unidad de Enfermedades Infecciosas, Servicio de Medicina Interna, Hospital Universitario  
1412 Puerta de Hierro, Instituto de Investigación Sanitaria Puerta de Hierro - Segovia de Arana,  
1413 Madrid, Spain
- 1414 <sup>123</sup>, Urgencias Hospitalarias, Complejo Hospitalario Universitario de A Coruña (CHUAC),  
1415 Sistema Galego de Saúde (SERGAS), A Coruña, Spain
- 1416 <sup>124</sup>, Grupo de Investigación en Interacciones Gen-Ambiente y Salud (GIIGAS) - Instituto de  
1417 Biomedicina (IBIOMED), Universidad de León, León, Spain
- 1418 <sup>125</sup>, Hospital Universitario Niño Jesús, Pediatrics Department, Madrid, Spain
- 1419 <sup>126</sup>, Unitat de Malalties Infeccioses i Importades, Servei de Pediatria, Infectious and Imported  
1420 Diseases, Pediatric Unit, Hospital Universitari Sant Joan de Deú, Barcelona, Spain
- 1421 <sup>127</sup>, Microbiology Department, Instituto de Investigación Sanitaria-Fundación Jiménez Díaz  
1422 University Hospital - Universidad Autónoma de Madrid (IIS-FJD, UAM), Madrid, Spain
- 1423 <sup>128</sup>, Fundación Pública Galega de Medicina Xenómica, Sistema Galego de Saúde (SERGAS)  
1424 Santiago de Compostela, Spain
- 1425 <sup>129</sup>, Instituto de Investigación Sanitaria de Santiago (IDIS), Santiago de Compostela, Spain
- 1426 <sup>130</sup>, Instituto de Genética Médica y Molecular (INGEMM), Hospital Universitario La Paz-  
1427 IDIPAZ, Madrid, Spain
- 1428 <sup>131</sup>, Hospital de Niños Ricardo Gutierrez, Buenos Aires, Argentina
- 1429 <sup>132</sup>, Centre for Biomedical Network Research on Rare Diseases (CIBERER), Instituto de Salud  
1430 Carlos III, Madrid, Spain Universidad Francisco de Vitoria, Madrid, Spain
- 1431 <sup>133</sup>, Hospital Infanta Elena, Servicio de Medicina Intensiva, Valdemoro, Madrid, Spain
- 1432 <sup>134</sup>, University of Salamanca, Biomedical Research Institute of Salamanca (IBSAL), Salamanca,  
1433 Spain
- 1434 <sup>135</sup>, Department of Immunology, IRYCIS, Hospital Universitario Ramón y Cajal, Madrid, Spain
- 1435 <sup>136</sup>, Osakidetza, Cruces University Hospital, Bizkaia, Spain

- 1436 <sup>137</sup>, Instituto Mexicano del Seguro Social, IMSS. Centro Médico Nacional La Raza. Hospital de  
1437 Infectología. Mexico City, Mexico.
- 1438 <sup>138</sup>, Hospital Universitario de Getafe, Servicio de Genética, Madrid, Spain
- 1439 <sup>139</sup>, Ministerio de Salud Ciudad de Buenos Aires, Buenos Aires, Argentina
- 1440 <sup>140</sup>, Hospital Clinico Universitario de Valladolid, Unidad de Apoyo a la Investigación,  
1441 Valladolid, Spain
- 1442 <sup>141</sup>, Universidad de Valladolid, Departamento de Cirugía, Valladolid, Spain
- 1443 <sup>142</sup>, Secretaria Municipal de Saude de Apodi, Natal, Brazil
- 1444 <sup>143</sup>, Sección Genética Médica - Servicio de Pediatría, Hospital Clínico Universitario Virgen de la  
1445 Arrixaca, Servicio Murciano de Salud, Murcia, Spain
- 1446 <sup>144</sup>, Departamento Cirugía, Pediatría, Obstetricia y Ginecología, Facultad de Medicina,  
1447 Universidad de Murcia (UMU), Murcia, Spain
- 1448 <sup>145</sup>, Hospital Universitario Centro Dermatológico Federico Lleras Acosta, Bogotá, Colombia
- 1449 <sup>146</sup>, Hospital Universitario Virgen de las Nieves, Servicio de Análisis Clínicos e Inmunología,  
1450 Granada, Spain
- 1451 <sup>147</sup>, Pneumology Department, Hospital General Universitario Gregorio Marañón (iiSGM),  
1452 Madrid, Spain
- 1453 <sup>148</sup>, Intermediate Respiratory Care Unit, Department of Pneumology, Instituto de Investigación  
1454 Sanitaria-Fundación Jiménez Díaz University Hospital - Universidad Autónoma de Madrid (IIS-  
1455 FJD, UAM), Madrid, Spain
- 1456 <sup>148</sup>, Clinica Comfamiliar Risaralda, Pereira, Colombia
- 1457 <sup>150</sup>, Centro Universitario de Tonalá, Universidad de Guadalajara, Guadalajara, Mexico
- 1458 <sup>151</sup>, Centro de Investigación Multidisciplinario en Salud, Universidad de Guadalajara,  
1459 Guadalajara, Mexico
- 1460 <sup>152</sup>, Unidad de Cuidados, Intensivos Hospital Clínico Universitario de Santiago (CHUS),  
1461 Sistema Galego de Saúde (SERGAS), Santiago de Compostela, Spain
- 1462 <sup>153</sup>, IIS La Fe, Plataforma de Farmacogenética, Valencia, Spain
- 1463 <sup>154</sup>, Universidad de Valencia, Departamento de Farmacología, Valencia, Spain
- 1464 <sup>155</sup>, Data Analysis Department, Instituto de Investigación Sanitaria-Fundación Jiménez Díaz  
1465 University Hospital - Universidad Autónoma de Madrid (IIS-FJD, UAM), Madrid, Spain
- 1466 <sup>156</sup>, Hospital del Mar, Infectious Diseases Service, Barcelona, Spain
- 1467 <sup>157</sup>, Institut Hospital del Mar d'Investigacions Mèdiques (IMIM), Barcelona, Spain
- 1468 <sup>158</sup>, CEXS-Universitat Pompeu Fabra, Spanish Network for Research in Infectious Diseases  
1469 (REIPI), Barcelona, Spain
- 1470 <sup>159</sup>, Biocruces Bizkaia Health Research Institute, Basurto University Hospital, Osakidetza,  
1471 Bizkaia, Spain
- 1472 <sup>160</sup>, Sabin Medicina Diagnóstica, Brazil
- 1473 <sup>161</sup>, Ophthalmology Department, Instituto de Investigación Sanitaria-Fundación Jiménez Díaz  
1474 University Hospital - Universidad Autónoma de Madrid (IIS-FJD, UAM), Madrid, Spain
- 1475 <sup>162</sup>, Hospital Sant Joan de Deu, Pediatric Critical Care Unit, Barcelona, Spain

- 1476 <sup>163</sup>, Paediatric Intensive Care Unit, Agrupación Hospitalaria Clínic-Sant Joan de Déu,  
1477 Esplugues de Llobregat, Barcelona, Spain
- 1478 <sup>164</sup>, Hospital Universitario 12 de Octubre, Department of Immunology, Madrid, Spain
- 1479 <sup>165</sup>, Instituto de Investigación Sanitaria Hospital 12 de Octubre (imas12), Transplant  
1480 Immunology and Immunodeficiencies Group, Madrid, Spain
- 1481 <sup>166</sup>, SIGEN Alianza Universidad de los Andes - Fundación Santa Fe de Bogotá, Bogotá,  
1482 Colombia
- 1483 <sup>167</sup>, Hospital General de Segovia, Medicina Intensiva, Segovia, Spain
- 1484 <sup>168</sup>, Programa de Pós-Graduação em Biologia Animal, Universidade de Brasília, Brasília, Brazil
- 1485 <sup>169</sup>, Clinical Trials Unit, Instituto de Investigación Sanitaria-Fundación Jiménez Díaz University  
1486 Hospital - Universidad Autónoma de Madrid (IIS-FJD, UAM), Madrid, Spain
- 1487 <sup>170</sup>, IMDEA-Food Institute, CEI UAM+CSIC, Madrid, Spain
- 1488 <sup>171</sup>, Intensive Care Unit, Hospital Universitario de Canarias, La Laguna, Spain
- 1489 <sup>172</sup>, Dirección General de Salud Pública, Consejería de Sanidad, Junta de Castilla y León,  
1490 Valladolid, Spain
- 1491 <sup>173</sup>, Universidade Federal do Rio Grande do Norte, Departamento de Analises Clinicas e  
1492 Toxicologicas, Natal, Brazil
- 1493 <sup>174</sup>, Hospital Universitario La Paz-IDIPAZ, Servicio de Inmunología, Madrid, Spain
- 1494 <sup>175</sup>, La Paz Institute for Health Research (IdiPAZ), Lymphocyte Pathophysiology in  
1495 Immunodeficiencies Group, Madrid, Spain
- 1496 <sup>176</sup>, Hospital Universitario Virgen de las Nieves, Servicio de Enfermedades Infecciosas,  
1497 Granada, Spain
- 1498 <sup>177</sup>, Instituto de Investigación Biosanitaria de Granada (ibs GRANADA), Granada, Spain
- 1499 <sup>178</sup>, Universidad de Granada, Departamento de Medicina, Granada, Spain
- 1500 <sup>179</sup>, Faculdade de Medicina, Universidade de Brasília, Brasilia, Brazil
- 1501 <sup>180</sup>, Fundación Jiménez Díaz, Epidemiology, Madrid, Spain
- 1502 <sup>181</sup>, Universidad Autónoma de Madrid, Department of Medicine, Madrid, Spain
- 1503 <sup>182</sup>, Universidad de Valladolid, Departamento de Medicina, Valladolid, Spain
- 1504 <sup>183</sup>, Hospital Universitario Infanta Leonor, Servicio de Medicina Intensiva, Madrid, Spain
- 1505 <sup>184</sup>, Unidad de Genética y Genómica Islas Baleares, Islas Baleares, Spain
- 1506 <sup>185</sup>, Hospital Universitario Son Espases, Unidad de Diagnóstico Molecular y Genética Clínica,  
1507 Islas Baleares, Spain
- 1508 <sup>186</sup>, Genomics of Complex Diseases Unit, Research Institute of Hospital de la Santa Creu i Sant  
1509 Pau, IIB Sant Pau, Barcelona, Spain
- 1510 <sup>187</sup>, Intensive Care Unit, Hospital Universitario N. S. de Candelaria, Santa Cruz de Tenerife,  
1511 Spain
- 1512 <sup>188</sup>, Preventive Medicine Department, Instituto de Investigación Sanitaria-Fundación Jiménez  
1513 Díaz University Hospital - Universidad Autónoma de Madrid (IIS-FJD, UAM), Madrid, Spain
- 1514 <sup>189</sup>, Servicio de Medicina Interna, Sanatorio Franchin, Buenos Aires, Argentina

- 1515 <sup>190</sup>, Hospital Universitario del Tajo, Servicio de Medicina Intensiva, Toledo, Spain
- 1516 <sup>191</sup>, Programa de Pós-Graduação em Ciências Médicas, Universidade de Brasília, Brasília, Brazil
- 1517 <sup>192</sup>, Programa de Pós-Graduação em Ciências da Saúde, Universidade de Brasília, Brasília,  
1518 Brazil
- 1519 <sup>193</sup>, Hospital El Bierzo, Gerencia de Asistencia Sanitaria del Bierzo (GASBI), Gerencia  
1520 Regional de Salud (SACYL), Ponferrada, Spain
- 1521 <sup>194</sup>, Grupo INVESTEN, Instituto de Salud Carlos III, Madrid, Spain
- 1522 <sup>195</sup>, Unidad de Cuidados Intensivos, Complejo Universitario de A Coruña (CHUAC), Sistema  
1523 Galego de Saúde (SERGAS), A Coruña, Spain
- 1524 <sup>196</sup> Programa de Pós-Graduação em Genética da Faculdade de Medicina de Ribeirão Preto  
1525 <sup>197</sup> Programa de Pós-Graduação em Química da Faculdade de Filosofia, Ciências e Letras de  
1526 Ribeirão Preto  
1527 <sup>198</sup>, Hospital El Bierzo, Unidad Cuidados Intensivos, León, Spain
- 1528 <sup>199</sup>, Spanish National Cancer Research Centre, Familial Cancer Clinical Unit, Madrid, Spain
- 1529 <sup>200</sup>, Instituto de Investigación Sanitaria San Carlos (IdISSC), Hospital Clínico San Carlos  
1530 (HCSC), Madrid, Spain
- 1531 <sup>201</sup>, Hospital Universitario Severo Ochoa, Servicio de Medicina Interna, Madrid, Spain
- 1532 <sup>202</sup>, Universidad de Sevilla, Departamento de Enfermería, Seville, Spain
- 1533 <sup>203</sup>, Hospital General Universitario Gregorio Marañón (IiSGM), Madrid, Spain
- 1534 <sup>204</sup>, Hospital Universitario La Paz-IDIPAZ, Servicio de Pediatría, Madrid, Spain
- 1535 <sup>205</sup>, ERN-ITHACA-European Reference Network
- 1536 <sup>206</sup>, Unidad de Genética y Genómica Islas Baleares, Unidad de Diagnóstico Molecular y  
1537 Genética Clínica, Hospital Universitario Son Espases, Islas Baleares, Spain
- 1538 <sup>207</sup>, Instituto de Investigación Sanitaria Islas Baleares (IdISBa), Islas Baleares, Spain
- 1539 <sup>208</sup>, Programa de Pós-Graduação em Biologia Animal, Universidade de Brasília, Brasília, Brazil
- 1540 <sup>209</sup>, Programa de Pós-Graduação em Ciências da Saúde, Universidade de Brasília, Brasília,  
1541 Brazil
- 1542 <sup>210</sup>, Programa de Pós-Graduação Profissional em Ensino de Biologia, Universidade de Brasília,  
1543 Brasília, Brazil
- 1544 <sup>211</sup>, Programa de Pós-Graduação em Ciências Médicas, Universidade de Brasília, Brasília, Brazil
- 1545 <sup>212</sup>, Anatomía Patológica, Instituto de Investigación Sanitaria San Carlos (IdISSC), Hospital  
1546 Clínico San Carlos (HCSC), Madrid, Spain
- 1547 <sup>213</sup>, Tecnológico de Monterrey, Monterrey, Mexico
- 1548 <sup>214</sup>, Infectious Diseases, Microbiota and Metabolism Unit, CSIC Associated Unit, Center for  
1549 Biomedical Research of La Rioja (CIBIR), Logroño, Spain
- 1550 <sup>215</sup>, Centro de Investigación en Anomalías Congénitas y Enfermedades Raras (CIACER),  
1551 Universidad Icesi
- 1552 <sup>216</sup>, Departamento de Genética, Fundación Valle del Lili
- 1553 <sup>217</sup>, Universidad Complutense de Madrid, Department of Immunology, Ophthalmology and  
1554 ENT, Madrid, Spain

- 1555 <sup>218</sup>, Department of Neumology, Instituto de Investigación Sanitaria-Fundación Jiménez Díaz  
1556 University Hospital - Universidad Autónoma de Madrid (IIS-FJD, UAM), Madrid, Spain
- 1557 <sup>219</sup>, Hospital Nuestra Señora de Sonsoles, Ávila, Spain
- 1558 <sup>220</sup>, Inditex, A Coruña, Spain
- 1559 <sup>221</sup>, Osakidetza, Cruces University Hospital, Barakaldo, Bizkaia, Spain
- 1560 <sup>222</sup>, GENYCA, Madrid, Spain
- 1561 <sup>223</sup>, Neuromuscular Diseases Unit, Department of Neurology, Hospital de la Santa Creu i Sant  
1562 Pau, Universitat Autònoma de Barcelona, Barcelona, Spain
- 1563 <sup>224</sup>, Instituto Mexicano del Seguro Social (IMSS), Centro Médico Nacional Siglo XXI, Unidad  
1564 de Investigación Médica en Enfermedades Infecciosas y Parasitarias, Mexico City, Mexico
- 1565 <sup>225</sup>, Catalan Institution of Research and Advanced Studies (ICREA), Barcelona, Spain
- 1566 <sup>226</sup>, Intensive Care Department, Instituto de Investigación Sanitaria-Fundación Jiménez Díaz  
1567 University Hospital - Universidad Autónoma de Madrid (IIS-FJD, UAM), Madrid, Spain
- 1568 <sup>227</sup>, Hospital Universitario Príncipe de Asturias, Servicio de Microbiología Clínica, Madrid,  
1569 Spain
- 1570 <sup>228</sup>, Universidad de Alcalá de Henares, Departamento de Biomedicina y Biotecnología, Facultad  
1571 de Medicina y Ciencias de la Salud, Madrid, Spain
- 1572 <sup>229</sup>, Drug Research Centre, Institut d'Investigació Biomèdica Sant Pau, IIB-Sant Pau, Barcelona,  
1573 Spain
- 1574 <sup>230</sup>, Departamento de Genética, Clínica Imbanaco
- 1575 <sup>231</sup>, Unidad de Cuidados Intensivos, Hospital Clínico Universitario de Santiago (CHUS),  
1576 Sistema Galego de Saúde (SERGAS), Santiago de Compostela, Spain
- 1577 <sup>232</sup>, Universidade de Brasília, Brasília, Brazil
- 1578 <sup>233</sup>, Department of Immunology, Hospital Universitario de Gran Canaria Dr. Negrín, Las Palmas  
1579 de Gran Canaria, Spain
- 1580 <sup>234</sup>, Department of Clinical Sciences, University Fernando Pessoa Canarias, Las Palmas de Gran  
1581 Canaria, Spain
- 1582 <sup>235</sup>, University Hospital Germans Trias i Pujol, Pediatrics Department, Badalona, Spain
- 1583 <sup>236</sup>, Department of Pathology, Biobank, Instituto de Investigación Sanitaria-Fundación Jiménez  
1584 Díaz University Hospital - Universidad Autónoma de Madrid (IIS-FJD, UAM), Madrid, Spain
- 1585 <sup>237</sup>, Hospital Universitario Virgen de las Nieves, Servicio de Medicina Interna, Granada, Spain
- 1586 <sup>238</sup>, Fundación Universitaria de Ciencias de la Salud, Grupo de Ciencias Básicas en Salud  
1587 (CBS), Bogotá, Colombia
- 1588 <sup>239</sup>, Sociedad de Cirugía de Bogotá, Hospital de San José, Bogotá, Colombia
- 1589 <sup>240</sup>, Universidad de Granada, Departamento Bioquímica, Biología Molecular e Inmunología III,  
1590 Granada, Spain
- 1591 <sup>241</sup>, Hospital Infanta Elena, Allergy Unit, Valdemoro, Madrid, Spain
- 1592 <sup>242</sup>, Faculty of Medicine, Universidad Francisco de Vitoria, Madrid, Spain
- 1593 <sup>243</sup>, Hospital Universitario Infanta Leonor, Madrid, Spain



- 1594 <sup>244</sup>, Complutense University of Madrid, Madrid, Spain
- 1595 <sup>245</sup>, Gregorio Marañón Health Research Institute (IiSGM), Madrid, Spain
- 1596 <sup>246</sup> Colégio Militar de Brasília
- 1597 <sup>247</sup>, The John Walton Muscular Dystrophy Research Centre, Newcastle University and
- 1598 Newcastle Hospitals NHS Foundation Trust, Newcastle upon Tyne, UK.
- 1599 <sup>248</sup>, Neuromuscular Unit, Neuropediatrics Department, Institut de Recerca Sant Joan de Déu,
- 1600 Hospital Sant Joan de Déu, Spain
- 1601 <sup>249</sup>, Fundació Docència i Recerca Mutua Terrassa, Terrassa, Spain
- 1602 <sup>250</sup>, Casa de Saúde São Lucas, Natal, Brazil
- 1603 <sup>251</sup>, Hospital Rio Grande, Rio Grande do Norte, Natal, Brazil
- 1604 <sup>252</sup>, Universidade Federal do Rio Grande do Norte, Pós-graduação em Biotecnologia - Rede de
- 1605 Biotecnologia do Nordeste (Renorbio), Natal, Brazil
- 1606 <sup>253</sup>, Intensive Care Unit, Hospital Universitario de Gran Canaria Dr. Negrín, Las Palmas de Gran
- 1607 Canaria, Spain
- 1608 <sup>254</sup>, Universidad Fernando Pessoa Canarias, Las Palmas de Gran Canaria, Spain
- 1609 <sup>255</sup>, Biobank, Puerta de Hierro-Segovia de Arana Health Research Institute, Madrid, Spain
- 1610 <sup>256</sup>, Universidad Rey Juan Carlos, Madrid, Spain
- 1611 <sup>257</sup>, Reumatology Service, Instituto de Investigación Sanitaria-Fundación Jiménez Díaz
- 1612 University Hospital - Universidad Autónoma de Madrid (IIS-FJD, UAM), Madrid, Spain
- 1613 <sup>258</sup>, Hospital Clinico Universitario de Valladolid, Servicio de Anestesiología y Reanimación,
- 1614 Valladolid, Spain
- 1615 <sup>259</sup>, Hospital Clinico Universitario de Valladolid, Servicio de Hematología y Hemoterapia,
- 1616 Valladolid, Spain
- 1617 <sup>260</sup>, Hospital Universitario Lauro Wanderley, Brazil
- 1618 <sup>261</sup>, Hospital Universitario Infanta Leonor, Servicio de Medicina Interna, Madrid, Spain
- 1619 <sup>262</sup>, University Hospital of Burgos, Burgos, Spain
- 1620 <sup>263</sup>, Universidad de Sevilla, Seville, Spain
- 1621 <sup>264</sup>, Fundación Santa Fe de Bogota, Instituto de servicios medicos de Emergencia y trauma,
- 1622 Bogotá, Colombia
- 1623 <sup>265</sup>, Universidad de los Andes, Bogotá, Colombia
- 1624 <sup>266</sup>, Quironprevención, A Coruña, Spain
- 1625 <sup>267</sup>, Junta de Castilla y León, Consejería de Sanidad, Valladolid, Spain
- 1626 <sup>268</sup>, Gerencia Atención Primaria de Burgos, Burgos, Spain
- 1627 <sup>269</sup>, Immunogenetics-Histocompatibility group, Servicio de Inmunología, Instituto de
- 1628 Investigación Sanitaria Puerta de Hierro - Segovia de Arana, Madrid, Spain
- 1629 <sup>270</sup>, Hospital del Mar, Department of Infectious Diseases, Barcelona, Spain
- 1630 <sup>271</sup>, IMIM (Hospital del Mar Medical Research Institute, Institut Hospital del Mar
- 1631 d'Investigacions Mediques), Barcelona, Spain
- 1632 <sup>272</sup>, Universitat Autònoma de Barcelona, Department of Medicine, Spain

- 1633 <sup>273</sup>, Consejería de Sanidad, Comunidad de Madrid, Madrid, Spain
- 1634 <sup>274</sup>, Centro para el Desarrollo de la Investigación Científica, Asunción, Paraguay
- 1635 <sup>275</sup>, Internal Medicine Department, Instituto de Investigación Sanitaria-Fundación Jiménez Díaz
- 1636 University Hospital - Universidad Autónoma de Madrid (IIS-FJD, UAM), Madrid, Spain
- 1637 <sup>276</sup>, Universidade Federal do Rio Grande do Norte, Programa de Pós Graduação em Nutrição,
- 1638 Natal, Brazil
- 1639 <sup>277</sup>, Preventive Medicine Department, Instituto de Investigacion Sanitaria Galicia Sur, Xerencia
- 1640 de Xestion Integrada de Vigo-Servizo Galego de Saúde, Vigo, Spain
- 1641 <sup>278</sup>, Universidade Federal do Rio Grande do Norte, Departamento de Infectologia, Natal, Brazil
- 1642 <sup>279</sup>, Hospital de Doenças Infecciosas Giselda Trigueiro, Rio Grande do Norte, Natal, Brazil
- 1643 <sup>280</sup>, Genomics Division, Instituto Tecnológico y de Energías Renovables, Santa Cruz de
- 1644 Tenerife, Spain
- 1645
- 1646
